# **Susceptibilities of human ACE2 genetic variants in coronavirus infection**

Wenlin Ren<sup>1\*</sup>, Yunkai Zhu<sup>2\*</sup>, Jun Lan<sup>3\*</sup>, Hedi Chen<sup>4\*</sup>, Yuyan Wang<sup>2</sup>, Hongyang Shi<sup>5</sup>, Fei Feng<sup>2</sup>, Da-Yuan Chen<sup>6,7</sup>, Brianna Close<sup>6,7</sup>, Xiaomin Zhao<sup>1</sup>, Jianping Wu<sup>8</sup>, Boxue Tian<sup>4</sup>, Zhenghong Yuan<sup>2</sup>, Dongming Zhou<sup>9</sup>, Mohsan Saeed<sup>6,7</sup>, Xinquan Wang<sup>3†</sup>, Rong Zhang<sup>2†</sup>, Qiang Ding<sup>1†</sup>

<sup>1</sup> Center for Infectious Disease Research, School of Medicine, Tsinghua University, Beijing 100084, China

<sup>2</sup> Key Laboratory of Medical Molecular Virology (MOE/NHC/CAMS), School of Basic Medical Sciences, Shanghai Medical College, Biosafety Level 3 Laboratory, Fudan University, Shanghai 200032, China

<sup>3</sup> School of Life Sciences, Tsinghua University, Beijing 100084, China

<sup>4</sup> School of Pharmaceutical Sciences, Tsinghua University, Beijing 100084, China

<sup>5</sup> CAS Key Laboratory of Molecular Virology and Immunology, Institut Pasteur of Shanghai, Chinese Academy of Sciences, Shanghai, China

<sup>6</sup> Department of Biochemistry, Boston University School of Medicine, Boston, MA, United States of America,

<sup>7</sup> National Emerging Infectious Diseases Laboratories, Boston University, Boston, MA, United States of America

<sup>8</sup> Key Laboratory of Structural Biology of Zhejiang Province, School of Life Sciences, Westlake University, 18 Shilongshan Road, Hangzhou 310024, Zhejiang Province, China

<sup>9</sup> Department of Pathogen Biology, School of Basic Medical Sciences, Tianjin Medical University, Tianjin, China

25   <sup>†</sup>Corresponding authors: qding@tsinghua.edu.cn (QD); rong\_zhang@fudan.edu.cn (R.Z.);  
26   xinquanwang@tsinghua.edu.cn (XW)

27   \*These authors contributed equally to this work.

28

29

## 30     **ABSTRACT**

31           The COVID-19 pandemic, caused by SARS-CoV-2, has resulted in more than 1603  
32   million cases worldwide and 3.4 million deaths (as of May 2021), with varying incidences  
33   and death rates among regions/ethnicities. Human genetic variation can affect disease  
34   progression and outcome, but little is known about genetic risk factors for SARS-CoV-2  
35   infection. The coronaviruses SARS-CoV, SARS-CoV-2 and HCoV-NL63 all utilize the  
36   human protein angiotensin-converting enzyme 2 (ACE2) as the receptor to enter cells. We  
37   hypothesized that the genetic variability in ACE2 may contribute to the variable clinical  
38   outcomes of COVID-19. To test this hypothesis, we first conducted an *in silico*  
39   investigation of single-nucleotide polymorphisms (SNPs) in the coding region of ACE2  
40   gene. We then applied an integrated approach of genetics, biochemistry and virology to  
41   explore the capacity of select ACE2 variants to bind coronavirus spike protein and  
42   mediate viral entry. We identified the ACE2 D355N variant that restricts the spike  
43   protein-ACE2 interaction and consequently limits infection both *in vitro* and *in vivo*. In  
44   conclusion, ACE2 polymorphisms could modulate susceptibility to SARS-CoV-2, which  
45   may lead to variable disease severity.

46

47   **Key words:** COVID-19, SARS-CoV, SARS-CoV-2, HCoV-NL63, ACE2, SNP.

48

## 49 INTRODUCTION

50 Coronaviruses (CoVs) are enveloped viruses with positive-sense, single-stranded  
51 RNA genomes that belong to the *Coronaviridae* family and *Orthocoronavirinae* subfamily<sup>1,2</sup>.  
52 There are four genera in this subfamily: *Alphacoronavirus*, *Betacoronavirus*,  
53 *Gammacoronavirus*, and *Deltacoronavirus*<sup>2</sup>. In the last two decades, three  
54 betacoronaviruses have caused outbreaks of severe pneumonia in humans: the severe  
55 acute respiratory syndrome coronavirus (SARS-CoV)<sup>3</sup>, the Middle East respiratory  
56 syndrome coronavirus (MERS-CoV)<sup>4</sup>, and SARS-CoV-2<sup>5-7</sup>, the cause of the ongoing  
57 COVID-19 pandemic.

58 Similar to SARS, the severity of COVID-19 disease is positively correlated with  
59 increased age, preexisting comorbidities, and/or other environmental factors<sup>8</sup>. Host  
60 genetic factors could also contribute to clinical outcomes, as demonstrated for other  
61 infectious diseases such as HIV and malaria<sup>9-12</sup>. Given the variable incidence and disease  
62 severity of COVID-19 in different regions and ethnicities of the world, human genetic  
63 variation has attracted increasing attention for its potential role in SARS-CoV-2  
64 transmission and pathogenicity<sup>13,14</sup>. Genome-wide association studies of severe  
65 COVID-19 patients have identified several genetic risk factors, including 6 genes found in  
66 a region of chromosome 3<sup>15,16</sup>. In addition, some individuals with life-threatening  
67 COVID-19 pneumonia were found to have a deficiency in their type I interferon  
68 (IFN)-mediated immune response due to genetic mutations or autoimmune antibodies  
69 targeting type I IFN<sup>17,18</sup>.

70 SARS-CoV-2, as well as SARS-CoV and human coronavirus NL63 (HCoV-NL63),  
71 utilizes the human protein ACE2 as a cellular receptor to gain entry into human cells<sup>19-22</sup>.  
72 The viral spike (S) protein of NL63, SARS-CoV, and SARS-CoV-2 is comprised of an S1  
73 and S2 domain, which are separated by a protease cleavage site. The S1 domain directly  
74 and specifically binds the peptidase domain of ACE2 via its receptor-binding domain  
75 (RBD), exposing the cleavage site for processing by host proteases. This ultimately leads  
76 to S2-mediated virus-host cell membrane fusion in a species-specific manner<sup>23</sup>. A number

77 of variations have been observed in the ACE2 gene, some of which have been  
 78 significantly associated with arterial hypertension, diabetes mellitus, cerebral stroke,  
 79 coronary artery disease, heart septal wall thickness and ventricular hypertrophy<sup>24</sup>.  
 80 However, it is unknown whether these natural ACE2 variants decrease or increase their  
 81 affinity for coronavirus S protein and affect the susceptibility of individuals to infection.

82 In this study, we performed a series of biochemical and functional experiments to  
 83 assess the impact of ACE2 SNPs on interaction with coronavirus S proteins and  
 84 SARS-CoV-2 entry *in vitro* and *in vivo*. This led to the identification of an SNP D355N  
 85 [rs961360700] that potentially protect individuals against SARS-CoV-2 infection. Our  
 86 study suggest that ACE2 polymorphism may alter human susceptibility to SARS-CoV-2  
 87 infection, and contribute to ethnic and geographical differences in SARS-CoV-2 spread.

88

## 89 RESULTS

### 90 Genetic polymorphisms in the human ACE2 gene could impact interaction with 91 coronavirus spike proteins.

92 ACE2 is a peptidase that is expressed on the surface of many cell types, including  
93 lung epithelial cells, and regulates the renin-angiotensin-aldosterone system<sup>25</sup>. ACE2  
94 polymorphisms associated with hypertension (HT) and diabetic heart disease have been  
95 previously described<sup>26,27</sup>. Here we surveyed the Genome Aggregation Consortium  
96 Database (gnomAD) (<https://gnomad.broadinstitute.org/>) and found that human ACE2 is  
97 highly polymorphic, with 223 ACE2 single-nucleotide variants (SNVs) that result in  
98 missense mutations. We hypothesized that these human ACE2 SNVs could influence  
99 susceptibility to SARS-CoV, SARS-CoV-2, and/or HCoV-NL63 and potentially affect  
100 disease outcomes. To test this, we chose 12 SNVs that led to amino acid substitutions at  
101 or in close proximity to the interface of the SARS-CoV, SARS-CoV-2 or HCoV-NL63 S  
102 protein complexed with human ACE2 (**Fig. 1A-B**)<sup>28-32</sup>. Of the 13 ACE2 SNVs, 4 have a  
103 mutated residue at the interface with the SARS-CoV-2 or SARS-CoV S protein (T17A  
104 [rs781255386], E37K [rs146676783], M82I [rs766996587] and D355N  
105 [rs961360700])<sup>28-30,32</sup> and 2 at the interface with the NL-63 S protein (E37K [rs146676783]  
106 and D355N [rs961360700])<sup>31</sup>.

107 To elucidate the potential impact of these mutations on viral entry, we predicted the  
108 binding affinity of the ACE2 variants and the viral spike proteins. By using the  
109 computational platform mCSM-PPI2<sup>33</sup>, we assessed the difference between the binding  
110 Gibbs free energy ( $\Delta G$ ) of the wild-type ACE2/spike protein complex with that of each  
111 variant ACE2/spike protein complex, thus calculating the  $\Delta\Delta G_{\text{wild type-mutant}}$  value.  
112 According to the mCSM-PPI2 calibration,  $\Delta\Delta G > +1$  kcal/mol is a confident indication that  
113 a variant has enhanced binding to the viral spike protein relative to the wild-type protein  
114 whereas a  $\Delta\Delta G < -1$  kcal/mol indicates a variant has impaired binding. Based on these  
115 criteria, most of the ACE2 SNVs exhibited limited alteration in their interaction with the  
116 viral spike proteins compared to wild-type ACE2 (**Fig. 1C**). However, the SNV E37K was

117 predicted to have a significantly decreased interaction with the SARS-CoV-2 spike  
118 ( $\Delta\Delta G = -1.1$  kcal/mol) and even more so with the NL63 spike ( $\Delta\Delta G = -1.6$  kcal/mol). G352V  
119 and D355N showed dramatically reduced binding with all three spike proteins. The other  
120 variants were considered to have an uncertain impact on binding (**Fig. 1C**).

121

## 122 **Human ACE2 variants bind coronavirus spike proteins with varying efficiencies in a** 123 **cell-based assay**

124 We next employed a cell-based assay that used flow cytometry to assess the binding  
125 of the viral S proteins to human ACE2 variants<sup>34,35</sup>. We cloned the cDNA of each human  
126 ACE2 variant (mouse ACE2 was included as a negative control) with a C-terminal FLAG  
127 tag into a bicistronic lentiviral vector, pLVX-IRES-zsGreen1. Since this vector contained  
128 the fluorescent protein zsGreen1 cloned under an internal ribosomal entry site (IRES)  
129 element, we used zsGreen1 expression as a measure of transduction efficiency. We  
130 transduced HeLa cells, which lack endogenous ACE2 expression<sup>19</sup>, and performed  
131 fluorescence-activated cell sorting (FACS) to collect cells with comparable expression  
132 levels of the ACE2 variants (**Fig. S1A and B**).

133 Next, we incubated HeLa-ACE2 variant cells with the purified fusion protein  
134 consisting of the S1 domain of the coronavirus S proteins being examined (SARS-CoV-2,  
135 SARS-CoV or HCoV-NL63) and an Fc domain of human IgG (S1-Fc) (1  $\mu$ g/ml). Binding of  
136 the fusion proteins to ACE2 was quantified by flow cytometry and the binding efficiency  
137 was calculated as the percent of S1-Fc positive cells among ACE2-expressing cells  
138 (zsGreen1+) (**Fig. 2A**). As expected, the S1-Fc proteins of SARS-CoV-2 or NL63 did not  
139 bind to HeLa cells expressing mouse ACE2 and showed levels comparable to that of the  
140 empty vector control, whereas SARS-CoV S1-Fc exhibited 21% binding efficiency.

141 For HeLa cells expressing the human ACE2 variants, the S1-Fc proteins exhibited  
142 varying levels of binding efficiencies. For example, SARS-CoV-2 S1-Fc bound to ACE2  
143 variants at a level similar to that of wild-type ACE2 (range of 82%-98% vs 93%), with the

exception of D355N variant that showed dramatically impaired binding (0.5%). Interestingly, SARS-CoV S1-Fc protein bound to some ACE2 variants (K26R, E35K, T92I) at a significantly higher efficiency (84.5%, 87.3%, 91.8%, respectively) compared to the wild-type ACE2 (77.1%). In contrast, other variants, such as T27A, E37K, and D355N showed decreased binding affinity, with the latter being the most impaired variant (0.7%).

Of the three coronavirus S proteins tested, the one from HCoV-NL63 bound human ACE2 the least efficiently (71.2%). In addition, it exhibited similar binding efficiencies for most of the ACE2 variants, except for E37K, E329G and D355N. While E329G bound 3-fold less efficiently than wild-type ACE2 (22.7% vs 71.2%), E37K and D355N were almost completely impaired in binding HCoV-NL63 spike protein (2.6% and 0.5%, respectively).

Collectively, our results showed that ACE2 variants exhibited varying binding abilities with the SARS-CoV-2, SARS-CoV and HCoV-NL63 spike proteins. Some ACE2 variants had virus-specific differences in binding spike protein. D355N was severely impaired in binding all three spike proteins tested. Increasing the concentration of SARS-CoV-2 S1-Fc, but not that of SARS-CoV or HCoV-NL63, did allow for some detection of binding with D355N (5µg/ml, 7%; 10µg/ml, 25.7%) (**Fig. S3A, B and C**). We confirmed that the striking differences in the binding between the ACE2 variants and spike proteins were not due to differing protein expression levels or cell-surface localization (**Fig. 2B, Fig S1, Fig. S2 and Fig. S4**). Together, these observations suggest that despite using the same cellular receptor, these coronaviruses evolved to utilize distinct amino acids of ACE2 for cell entry.

#### **Binding of ACE2 SNVs with coronavirus spike protein *in vitro* by SPR analysis**

To further assess the binding of the ACE2 SNVs with the coronavirus spike proteins, we expressed and purified recombinant ACE2 variants, SARS-CoV-2 receptor-binding domain (RBD), SARS-CoV RBD, and HCoV-NL63 RBD, and directly assayed the protein binding *in vitro* by surface plasmon resonance (SPR) analysis (**Fig. S5A-B**). The



171 dissociation constant ( $K_d$ ) for wild-type ACE2 binding the SARS-CoV-2 RBD was 183.7nM  
 172 while that of E37K or M82I was about 5-6 fold higher (877.8nM and 1050nM, respectively).  
 173 In line with our cell-based assay, no binding of D355N with SARS-CoV-2 was detected.  
 174 The  $K_d$  of other SNVs with the SARS-CoV-2 RBD ranged from 77-371.7nM (**Fig. S6A, Fig.**  
 175 **2C**) and were consistent with the binding efficiencies determined in our cell-based assay  
 176 (**Fig. 2A**).

177 For SARS-CoV RBD, the  $K_d$  for wild-type ACE2 was 511.4nM while the binding of  
 178 E37K or D355N was not detected. The  $K_d$  for other SNVs ranged from 300-1693nM, not  
 179 strikingly different from wild-type ACE2 (**Fig. S6B, Fig. 2C**). With respect to binding the  
 180 HCoV-NL63 RBD, wild-type human ACE2 had a  $K_d$  of 575nM while E37K and E329G had  
 181 5- and 3-fold less affinity ( $K_d$  of 2608nM and 1742nM, respectively). Similar to the other  
 182 RBD proteins, HCoV-NL63-CoV RBD did not bind the D355N variant (**Fig. S6C, Fig. 2C**).

183 Collectively, our SPR analysis suggests that the ACE2 SNVs possess distinct binding  
 184 affinities for the three coronavirus RBDs examined. Notably, D355N bound all three  
 185 coronavirus RBDs with limited affinity in both cell-based and SPR assays.

186

# 187 **Ability of ACE2 SNVs to mediate entry of virus pseudotyped with coronavirus spike** 188 **protein**

189 To assess the functionality of the human ACE2 variants, we evaluated their ability to  
 190 support the entry of virus pseudotyped with either SARS-CoV-2 or SARS-CoV spike  
 191 protein. To this end, we produced pseudotyped virus particles containing a firefly  
 192 luciferase reporter gene and expressing on their surface either vesicular stomatitis virus  
 193 glycoprotein (VSV-G; positive control) or the spike proteins of SARS-CoV-2 or SARS-CoV.  
 194 HeLa cells expressing the ACE2 variants were then inoculated with these pseudoparticles  
 195 and at 48h post-inoculation, the cells were lysed and the luciferase activity was monitored  
 196 as a measure of virus entry. As expected, the VSV-G pseudoparticles readily infected cells  
 197 independent of which ACE2 variant was expressed (**Fig. 3A-B, red columns**). Compared

198 to vector-transduced HeLa cells, expression of human ACE2 enhanced the entry of  
199 SARS-CoV-2 pseudoparticles by 173-fold (**Fig. 3A-B, blue columns**). Most of the ACE2  
200 SNVs mediated SARS-CoV-2 pseudoparticle entry at comparable levels, with the  
201 luciferase activity 125-269 fold higher than the negative control. However, viral entry was  
202 dramatically compromised in cells expressing E329G and D355N, with the luciferase  
203 activity increased by only 30- and 10-fold of the negative control, respectively.

204 Human ACE2 could mediate SARS-CoV pseudoparticle entry, as demonstrated by a  
205 1000-fold increase in luciferase activity. Most of the ACE2 SNVs mediated SARS-CoV  
206 pseudoparticle entry to a similar extent (700-1200-fold increase over negative control).  
207 However, the luciferase activity of cells expressing D355N was severely impaired and only  
208 32-fold higher than the negative control.

209 Taken together, these findings show that the ACE2 SNVs vary in their ability to  
210 support viral entry. In agreement with the data from our other assays, the D355N variant  
211 was especially limited in its ability to support SARS and SARS-CoV-2 pseudoparticle  
212 entry.

213

## 214 **Ability of ACE2 variants to mediate authentic SARS-CoV-2 infection *in vitro* and *in*** 215 ***vivo***

216 As demonstrated above, most of the ACE2 variants were able to bind SARS-CoV-2  
217 spike protein and support efficient entry of pseudovirus particles. However, three of the  
218 variants showed suboptimal activity against either all or a subset of the three viruses we  
219 tested. Also, some discrepancies were noted between the protein binding and  
220 pseudovirus entry assays. For example, E37K was impaired in binding with the  
221 SARS-CoV spike protein but mediated efficient entry of SARS-CoV pseudoparticles. In  
222 contrast, although E329G showed high binding efficiency for the SARS-CoV-2 spike  
223 protein, it supported SARS-CoV-2 pseudoparticle entry significantly less than wild-type  
224 ACE2. D355N was highly deficient in interacting with spike of all viruses, both in the

225 binding as well as pseudovirus entry assays (**Fig. 2A and C**).

226 To further assess E37K, E329G, and D355N variants, we tested their ability to  
227 mediate authentic SARS-CoV-2 entry. HeLa cells ectopically expressing individual ACE2  
228 variants were infected with SARS-CoV-2 virus at different doses (MOI=0.03, 0.1, 0.3 and  
229 1) (**Fig. 4A**). At 48 h post-infection, the variant-expressing cells were fixed and stained  
230 with an antibody directed against the viral nucleocapsid (N) protein, an indicator of virus  
231 infection and replication. As expected, HeLa cells expressing mouse ACE2 were not  
232 susceptible to SARS-CoV-2 infection while those expressing wild-type human ACE2  
233 showed high levels of infection. ACE2 SNVs E37K and E329G were comparable to  
234 wild-type ACE2 in mediating viral infection, whereas D355N supported significantly lower  
235 infection (**Fig. 4B**).

236 Next, we further evaluated D355N *in vivo* using a mouse model transduced with  
237 replication-defective adenovirus encoding a functional human ACE2 gene which has  
238 previously been shown to support productive SARS-CoV-2 infection<sup>34,36,37</sup>. BALB/c mice  
239 were transduced intranasally with recombinant adenovirus expressing human ACE2, the  
240 D355N SNV or a vector control followed by intranasal infection with SARS-CoV-2. After 3  
241 days of SARS-CoV-2 infection, mice were sacrificed and lung tissues collected for viral  
242 antigen detection and viral load titration by focus-forming assay (**Fig. 5A**). To examine the  
243 viral antigen spread in the lungs, we performed immunochemical staining with anti-N  
244 antibody. Viral N antigen was only well detected in lungs from infected mice transduced  
245 with hACE2 and its D355N variant, however, the viral N antigen was less abundant in that  
246 of D355N variants (**Fig. 5B**). Consistent with the N antigen staining, the greatest levels of  
247 infectious SARS-CoV-2 virus (about  $1 \times 10^6$  FFU/g of lung tissue) were in lung tissue  
248 homogenates from mice transduced with hACE2; viral load in that of D355N transduced  
249 mice was moderately reduced (about  $1 \times 10^5$  FFU/g of lung tissue), whereas virtually none  
250 or minimal levels were detected in that of mice transduced with vector (**Fig. 5C**). Taken  
251 together, our results demonstrate that D355N is limited in susceptibility to SARS-CoV-2  
252 infection *in vitro* and *in vivo*.



## 254 DISCUSSION

255 Clinical outcomes of SARS-CoV-2 infection range from asymptomatic or mildly  
 256 symptomatic infections to severe pneumonia, respiratory failure, and even death<sup>23</sup>.  
 257 Epidemiological studies have identified at least three risk factors for severe disease: being  
 258 male, of advanced age, and having certain co-morbidities<sup>5,38</sup>. Genetic factors have also  
 259 been linked to the severity of COVID-19, such as polymorphisms in a cluster of genes on  
 260 chromosome 3 (including the *SLC6A20*, *LZTFL1*, *CCR9*, *FYCO1*, *CXCR6*, and *XCR1*  
 261 genes)<sup>15,16</sup> and genetic deficiency in the type I IFN pathway<sup>17</sup>. Such findings are of utmost  
 262 biological and medical importance for understanding the pathogenesis of COVID-19 and  
 263 development of countermeasures. ACE2 is the receptor for SARS-CoV, SARS-CoV-2 and  
 264 HCoV-NL63<sup>19,21,22,39</sup> and is also the major genetic determinant of host range and tissue  
 265 tropism for these viruses<sup>34,40-42</sup>. *ACE2* encodes for a metallopeptidase that catalyzes the  
 266 conversion of angiotensin II to angiotensin, which acts as a vasodilator and exerts  
 267 important modulatory effects on the cardiovascular system<sup>27</sup>. ACE2 SNPs have been  
 268 found in association with multiple disorders, including essential hypertension, dyslipidemia,  
 269 hypertrophic cardiomyopathy, and ventricular hypertrophy<sup>24</sup>. Therefore, an investigation of  
 270 the impact of ACE2 polymorphisms on SARS-CoV-2 infection is critical and could pave  
 271 the way for personalized treatment strategies for COVID-19.

272 In this study, we evaluated how select ACE2 SNVs compare to the wild-type protein  
 273 in their binding efficiency with the spike proteins of SARS-CoV, SARS-CoV-2 and  
 274 NL63-HCoV. We also examined the functionality of these ACE2 variants in mediating  
 275 infection of virus particles pseudotyped with these different coronavirus spike proteins as  
 276 well as their ability to support authentic virus infection both *in vitro* and *in vivo*. ACE2 is  
 277 one of the most polymorphous genes in human populations, with 223 missense SNVs  
 278 recorded in the gnomAD database (<https://gnomad.broadinstitute.org/>). As the structure of  
 279 viral spike protein complexed with human ACE2 has been solved<sup>28-30</sup>, the residues at the  
 280 interface of the complex are well characterized. We chose 12 SNVs with substitutions at  
 281 or closest to the complex interface, hypothesizing that these SNVs would have the

greatest impact on the spike-ACE2 interaction. We identified several missense ACE2 SNVs that showed significantly altered interaction with the spike proteins of three coronaviruses we tested. The variant D355N [rs961360700] was of particular interest, as it had a significant increase in predicted binding free energy (**Fig.1B**), limited binding affinity with spikes in both cell-based and SPR assays (**Fig. 2A and C**), and reduced susceptibility to authentic SARS-CoV-2 infection *in vitro* and *in vivo* (**Fig. 4 and Fig. 5**). These findings provide experimental evidence that a human ACE2 D355N [rs961360700] polymorphism can affect susceptibility to SARS-CoV-2, SARS-CoV or HCoV-NL63 infection. Based on analysis of the structure of ACE2 complexed with SARS-CoV-2 RBD<sup>28-30</sup>, the loop in a beta sheet (K353-R357) of ACE2 is critical for RBD binding, and the D355N mutation could disrupt the beta sheet structure, which might explain why D355N mutant is refractory to binding by the SARS-CoV-2 spike protein.

We note that our conclusions are based on experiments performed in cell culture and in an artificial animal model and therefore have certain limitations. It will be important to extend this work to a real-world study, which could bridge the gap between genotype, phenotype and epidemiology. In addition, we only considered the effect of ACE2 SNVs. As the serine protease TMPRSS2 can prime the viral spike for direct fusion with the plasma membrane<sup>39,43</sup>, SNPs in TMPRSS2 might also impact SARS-CoV-2 cell entry and be useful target of future studies. Moreover, SNPs in the 5'UTR or other non-coding regions of ACE2 were not included in this study and may also be important in regulating ACE2 transcription or translation, leading to varied ACE2 protein levels *in vivo* that could affect virus entry and the severity of COVID-19. Due to these limitations, we urge caution not to over interpret the results of this study.

Of note, SARS-CoV-2 has evolved rapidly in humans, and a variety of genomic changes, including mutations and deletions in the spike protein, have recently been identified<sup>44,45</sup>. Given that genetic variants will continue to arise, it is likely that we will see more genomic changes in the spike protein that might affect the spike interaction with human ACE2. Thus, it will be important to continue testing the interactions of these

310 mutated spike proteins with the ACE2 SNVs. In summary, our study suggest that ACE2  
311 polymorphism could impact human susceptibility to SARS-CoV-2 infection, which  
312 contribute to ethnic and geographical differences in SARS-CoV-2 spread and  
313 pathogenicity.

314

## 315        **Acknowledgements**

316        We would like to acknowledge Di Qu, Zhiping Sun, Wendong Han, Gaowei Hu and  
 317        other colleagues at the Biosafety Level 3 Laboratory of Fudan University for help with  
 318        experiment design and technical assistance. We thank Dr. Jenna M. Gaska for  
 319        suggestions and revision of the manuscript.

320        This work was supported by the National Natural Science Foundation of China  
 321        (32070153 to QD; 32041005 to RZ), Beijing Municipal Natural Science Foundation  
 322        (M21001 to QD), Tsinghua-Peking University Center of Life Sciences (045-61020100120),  
 323        Start-up Foundation of Tsinghua University (53332101319), Shanghai Municipal Science  
 324        and Technology Major Project (20431900400) and Project of Novel Coronavirus Research  
 325        of Fudan University.

326



## 327 **Materials and Methods**

328 **Cell cultures and SARS-CoV-2 virus.** HEK293T cells (American Tissue Culture  
329 Collection, ATCC, Manassas, VA, CRL-3216), Vero E6 (Cell Bank of the Chinese  
330 Academy of Sciences, Shanghai, China) and HeLa (ATCC #CCL-2) were maintained in  
331 Dulbecco's modified Eagle medium (DMEM) (Gibco, NY, USA) supplemented with 10%  
332 (vol/vol) fetal bovine serum (FBS), 10mM HEPES, 1mM sodium pyruvate,  
333 1xnon-essential amino acids, and 50 IU/ml penicillin/streptomycin in a humidified 5%  
334 (vol/vol) CO<sub>2</sub> incubator at 37°C. Cells were tested routinely and found to be free of  
335 mycoplasma contamination. The SARS-CoV-2 strain nCoV-SH01 (GenBank accession no.  
336 MT121215) was isolated from a COVID-19 patient and propagated in Vero E6 cells for  
337 use. All experiments involving virus infections were performed in the biosafety level 3  
338 facility of Fudan University following the appropriate regulations.

339 **Plasmids.** The cDNAs encoding ACE2 orthologs (Table S1) were synthesized by  
340 GenScript and cloned into pLVX-IRES-zsGreen1 vectors (Catalog No. 632187, Clontech  
341 Laboratories, Inc) with a C-terminal FLAG tag. ACE2 mutants were generated by  
342 Quikchange (Stratagene) site-directed mutagenesis. All of the constructs were verified by  
343 Sanger sequencing.

344 **Lentivirus production.** VSV-G-pseudotyped lentiviruses expressing ACE2 orthologs  
345 tagged with FLAG at the C-terminus were produced by transient co-transfection of the  
346 third-generation packaging plasmids pMD2G (Addgene #12259) and psPAX2 (Addgene  
347 #12260) and the transfer vector with VigoFect DNA transfection reagent (Vigorous) into  
348 HEK293T cells. The medium was changed 12 h post transfection. Supernatants were  
349 collected at 24 and 48h after transfection, pooled, passed through a 0.45-μm filter, and  
350 frozen at -80°C.

351 **Protein expression and purification.** The RBDs of SARS-CoV-2, SARS-CoV,  
352 NL63-CoV and the N-terminal peptidase domain of wild-type and human ACE2 SNVs  
353 were expressed using the Bac-to-Bac baculovirus system (Invitrogen). Specifically,  
354 SARS-CoV-2 RBD (residues Thr333-Pro527), SARS-CoV RBD (residues

355 Arg306–Leu515), or NL63-CoV RBD (residues Gln481-Ile616) with a N-terminal gp67  
 356 signal peptide for secretion and a C-terminal 6xHis tag for purification was inserted into  
 357 pFastBac-Dual vector (Invitrogen). The recombinant baculoviruses were generated  
 358 according to the manufacture's instruction to infect Hi5 cells at a density of  $2 \times 10^6$  cells/ml.  
 359 After 60h, the supernatant of cell culture containing the RBD was collected, concentrated  
 360 and buffer-exchanged to HBS (10 mM HEPES, pH 7.2, 150 mM NaCl). The recombinant  
 361 RBD was captured by Ni-NTA resin (GE Healthcare) and eluted with 500 mM imidazole in  
 362 HBS buffer. RBD was then purified by gel-filtration chromatography using the Superdex  
 363 200 column (GE Healthcare) pre-equilibrated with HBS buffer. Fractions containing RBD  
 364 were collected for further analysis. The N-terminal peptidase domain of each human  
 365 ACE2 (residues Met1-Asp615) variant was expressed and purified by essentially the  
 366 same protocol used for RBD.

367 **Surface ACE2 binding assay.** HeLa cells were transduced with lentiviruses expressing  
 368 the ACE2 from different species for 48 h. The cells were collected with TrypLE (Thermo  
 369 #12605010) and washed twice with cold PBS. Live cells were incubated with the  
 370 recombinant proteins, S1 domain of SARS-CoV-2, SARS-CoV or NL63 spike C-terminally  
 371 fused with Fc (1 µg/ml) at 4 °C for 30 min. After washing, cells were stained with goat  
 372 anti-human IgG (H + L) conjugated to Alexa Fluor 647 (Thermo #A21445, 2 µg/ml) for 30  
 373 min at 4 °C. Cells were then washed twice and subjected to flow cytometry analysis  
 374 (Thermo, Attune™ NxT).

375 **Surface Plasmon Resonance (SPR) experiments.** SARS-CoV RBD, SARS-CoV-2 RBD  
 376 or NL63 RBD was immobilized to a CM5 sensorchip (GE Healthcare) using a Biacore  
 377 T200 (GE Healthcare) and a running buffer composed of 10 mM HEPES pH 7.2, 150 mM  
 378 NaCl and 0.05% Tween 20. Serial dilutions of ACE2 SNVs proteins were flowed through  
 379 with a concentration ranging from 1600 to 25 nM. The resulting data were fit to a 1:1  
 380 binding model using Biacore Evaluation Software (GE Healthcare).

381 **Production of SARS-CoV-2 or SARS-CoV pseudotyped virus.** Pseudoviruses were  
 382 produced in HEK293T cells by co-transfecting the retroviral vector pTG-MLV-Fluc,

383 pTG-MLV-Gag-pol, and pcDNA3.1 expressing the SARS-CoV spike, SARS-CoV-2 spike  
384 or VSV-G (pMD2.G (Addgene #12259)) using VigoFect (Vigorous Biotechnology). At 48 h  
385 post transfection, the cell culture medium was collected for centrifugation at 3500 rpm for  
386 10 min, and then the supernatant was subsequently aliquoted and stored at -80°C for  
387 further use. Virus entry was assessed by transduction of pseudoviruses in cells  
388 expressing ACE2 variants in 48-well plates. After 48 h, intracellular luciferase activity was  
389 determined using the Luciferase Assay System (Promega, Cat. #E1500) according to the  
390 manufacturer's instructions. Luminescence was recorded on a GloMax Discover System  
391 (Promega).

392 **Immunofluorescence staining of viral nucleocapsids.** HeLa cells were transduced  
393 with lentiviruses expressing the ACE2 from different species for 48 h. Cells were then  
394 infected with nCoV-SH01 at an MOI of 1 for 1 h, washed three times with PBS, and  
395 incubated in 2% FBS culture medium for 48 h for viral antigen staining. Cells were fixed  
396 with 4% paraformaldehyde in PBS, permeabilized with 0.2% Triton X-100, and incubated  
397 with the rabbit polyclonal antibody against SARS-CoV nucleocapsid protein (Rockland,  
398 200-401-A50, 1µg/ml) at 4 °C overnight. After three washes, cells were incubated with the  
399 secondary goat anti-rabbit antibody conjugated to Alexa Fluor 488 (Thermo #A11034, 2  
400 µg/ml) for 2 h at room temperature, followed by staining with  
401 4',6-diamidino-2-phenylindole (DAPI). Images were collected using an EVOS™  
402 Microscope M5000 Imaging System (Thermo #AMF5000). Images were processed using  
403 the ImageJ program (<http://rsb.info.nih.gov/ij/>).

404 **Generation and production of recombinant adenovirus expressing ACE2 variants.**  
405 cDNA of ACE2 variants with a FLAG tag at the C-terminus was cloned into pShuttle. The  
406 pShuttle-ACE2 plasmids were then electroporated 440 into BJ5183 AD-1 cells (Agilent),  
407 which were pretransformed with pAdEasy-1 to facilitate recombination with the  
408 pShuttle-CMV vector. The adenovirus constructs were then transfected into HEK293 cells.  
409 The transfected HEK293 cells were maintained until the cells exhibited complete  
410 cytopathic effect (CPE) and then harvested and freeze-thawed. The supernatants were

411 serially passaged two more times, with harvest at complete CPE and freeze-thaw. For  
412 virus purification, the cell pellets were purified using cesium chloride density-gradient  
413 ultracentrifugation, and the number of virus particles was determined using a Nanodrop  
414 2000 (Thermo Fisher Scientific). The adenovirus stocks were aliquoted and stored at  
415 -80°C.

416 **SARS-CoV-2 infection of adenovirus transduced mice.** Six to eight week-old male  
417 mice (BALB/c) were transduced intranasally with adenovirus expressing wild-type ACE2,  
418 the D355N variant or empty control ( $5 \times 10^{10}$  viral particles per mouse). After 3 days, mice  
419 were infected intranasally with SARS-CoV-2 ( $8 \times 10^4$  FFU per mouse) and sacrificed at day  
420 3 post infection. The lung tissues were harvested for histopathological analysis and virus  
421 titration. This animal experiment protocol was approved by the Animal Ethics Committee  
422 of the School of Basic Medical Sciences at Fudan University.

423 **Histological analysis.** Lung tissues were harvested and fixed in 4% paraformaldehyde  
424 (PFA) for 48 h. Tissues were embedded in paraffin for sectioning. To detect the expression  
425 of FLAG-tagged ACE2 delivered by adenovirus, the sections were incubated in blocking  
426 reagent and then with FLAG M2 antibody (1:100 dilution, Sigma-Aldrich #1804) at 4 °C  
427 overnight, followed by incubation with HRP-conjugated goat anti-mouse IgG secondary  
428 antibody (1:5000 dilution, Invitrogen). For viral antigen detection, the sections were  
429 incubated with house-made mouse anti-SARS-CoV-2 nucleocapsid protein serum (1:5000)  
430 and HRP465 conjugated goat anti-mouse IgG secondary antibody (1:5000 dilution,  
431 Invitrogen). The lung sections from the vector-transduced mouse were used as negative  
432 control. The sections were observed under microscope (Olympus, Tokyo, Japan).

433 **Virus load determination by focus-forming assay.** Vero E6 monolayer in 96-well plates  
434 were inoculated with serially diluted virus for 2 h and then overlaid with methylcellulose for  
435 48 h. Cells were fixed with 4% paraformaldehyde in PBS for 1 h and permeabilized with  
436 0.2% Triton X-100 for 1 h. Cells were stained with homemade mouse anti-SARS-CoV-2 N  
437 serum overnight at 4°C, incubated with the secondary goat anti-mouse HRP-conjugated  
438 antibody for 2 h at room temperature. The focus-forming unit was developed using

439 TrueBlue substrate (Sera Care #5510–0030).

440 **Statistics analysis.** One-way analysis of variance (ANOVA) with Tukey's honestly  
 441 significant difference (HSD) test was used to test for statistical significance of the  
 442 differences between the different group parameters. *P* values of less than 0.05 were  
 443 considered statistically significant.

444

# 445 **Figures and Figure legends**

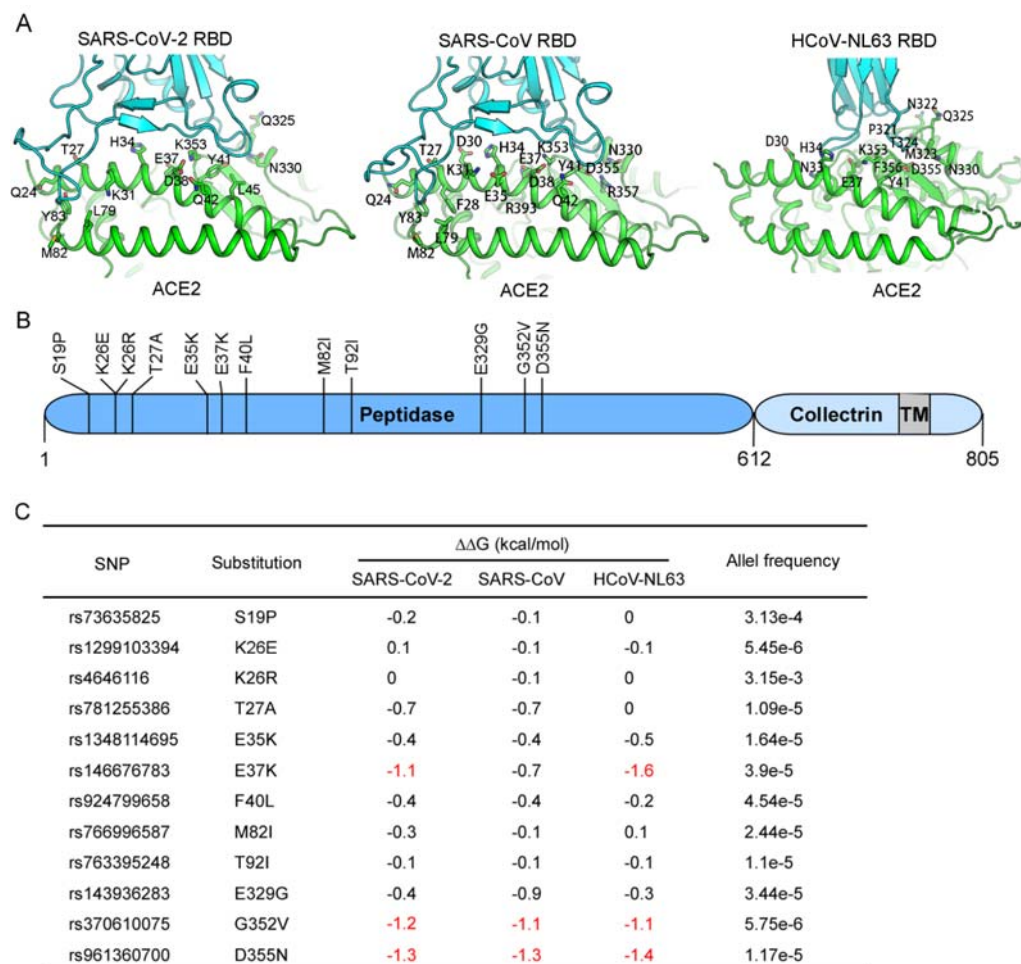

446 **Figure 1. Schematic representation of the ACE2 molecule and positions of the**  
447 **studied SNP loci. (A)** The structures of human ACE2 complexed with the spike proteins  
448 of SARS-CoV-2 (PDB code: 6M0J), SARS-CoV (PDB code: 2AJF) or HCoV-NL63 (PDB  
449 code: 3KBH). ACE2 and the spike protein of each virus are colored in green and cyan,  
450 respectively. The residues of ACE2 at the interface with each spike protein are highlighted.  
451 **(B)** Coding-region variants from gnomAD in the genes encoding ACE2 used in this study  
452 are indicated. The SNPs and the alteration of the amino acids in this study are shown. **(C)**  
453 Prediction of the interaction of coronavirus spike proteins with ACE2 variants. The  $\Delta\Delta G$  for  
454 missense mutation was calculated by mCSM-PPI2 with PBD 2AJF (SARS-CoV spike

455     complexed with human ACE2), 6M0J (SARS-CoV-2 spike complexed with human ACE2)  
 456     or 3KBH (NL63-CoV spike complexed with human ACE2) as the model. The individual  
 457     SNPs are named according to their identification numbers registered at the SNP database  
 458     (dbSNP). The allele frequency of SNPs are as referenced in gnomAD database.

459

460

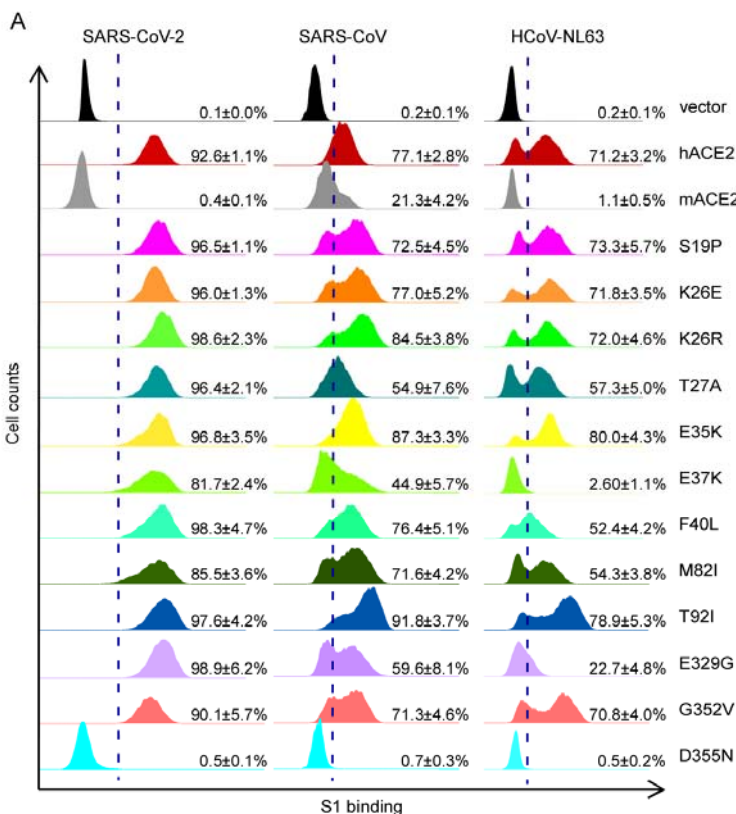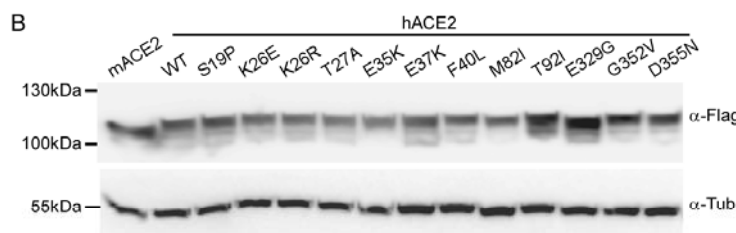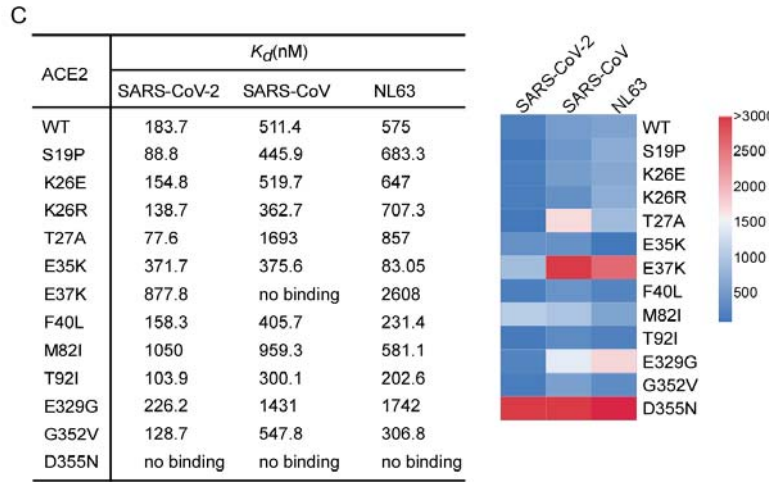



461 **Figure 2. ACE2 variants bind viral spike proteins. (A)** HeLa cells transduced with  
 462 ACE2 variants were incubated with the recombinant S1 domain of the SARS-CoV-2,  
 463 SARS-CoV or HCoV-NL63 spike proteins C-terminally fused with Fc (1µg/ml). Cells were  
 464 then incubated with goat anti-human IgG (H+L) conjugated to Alexa Fluor 647 followed by  
 465 flow cytometry analysis. Values are binding efficiencies defined as the percent of  
 466 ACE2-expressing cells (zsGreen1+) positive for S1-Fc. Error bars represent the SD of the  
 467 mean from one representative experiment with three biological replicate samples and this  
 468 experiment was independently repeated three times. **(B)** HeLa cells transduced with  
 469 lentiviruses expressing FLAG-tagged human ACE2 variants were subjected to  
 470 immunoblotting. Tubulin served as the loading control. This experiment was  
 471 independently repeated three times with similar results. A representative blot is shown. **(C)**  
 472 Affinity of ACE2 SNVs for coronavirus spike proteins. Dissociation constant ( $K_d$ ) values  
 473 were determined by SPR and are presented as a heatmap according to the indicated  
 474 color legend. This experiment was independently repeated three times with similar result  
 475 and the results from one representative experiment are shown.

476

477

478

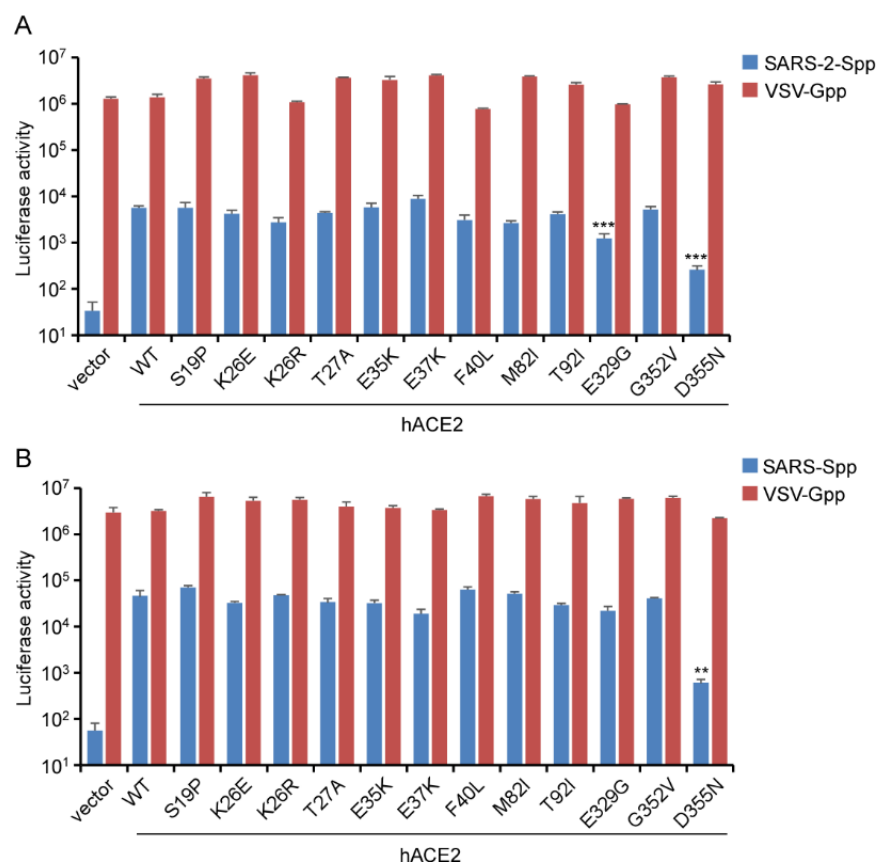

Fig

ure

3.

The

abili

ty

of

AC

E2

vari

ant

s to

faci

litat

e

494

entr

495 **y of virus pseudotyped with coronavirus spike proteins. (A-B)** HeLa cells transduced  
496 with lentiviruses expressing ACE2 orthologs, SNVs or empty vector were infected with  
497 virus pseudotyped with SARS-CoV spike, SARS-CoV-2 spike or VSV-G and containing a  
498 firefly luciferase (Fluc) reporter gene. Intracellular Fluc activity of cell lysates was  
499 determined after 72h of infection. Error bars represent the SD of the mean from one  
500 representative experiment with three biological replicates and this experiment was  
501 independently repeated at least three times. \*\*,  $p < 0.01$ , \*\*\*,  $p < 0.005$ . Significance  
502 assessed by one-way ANOVA.

503

504

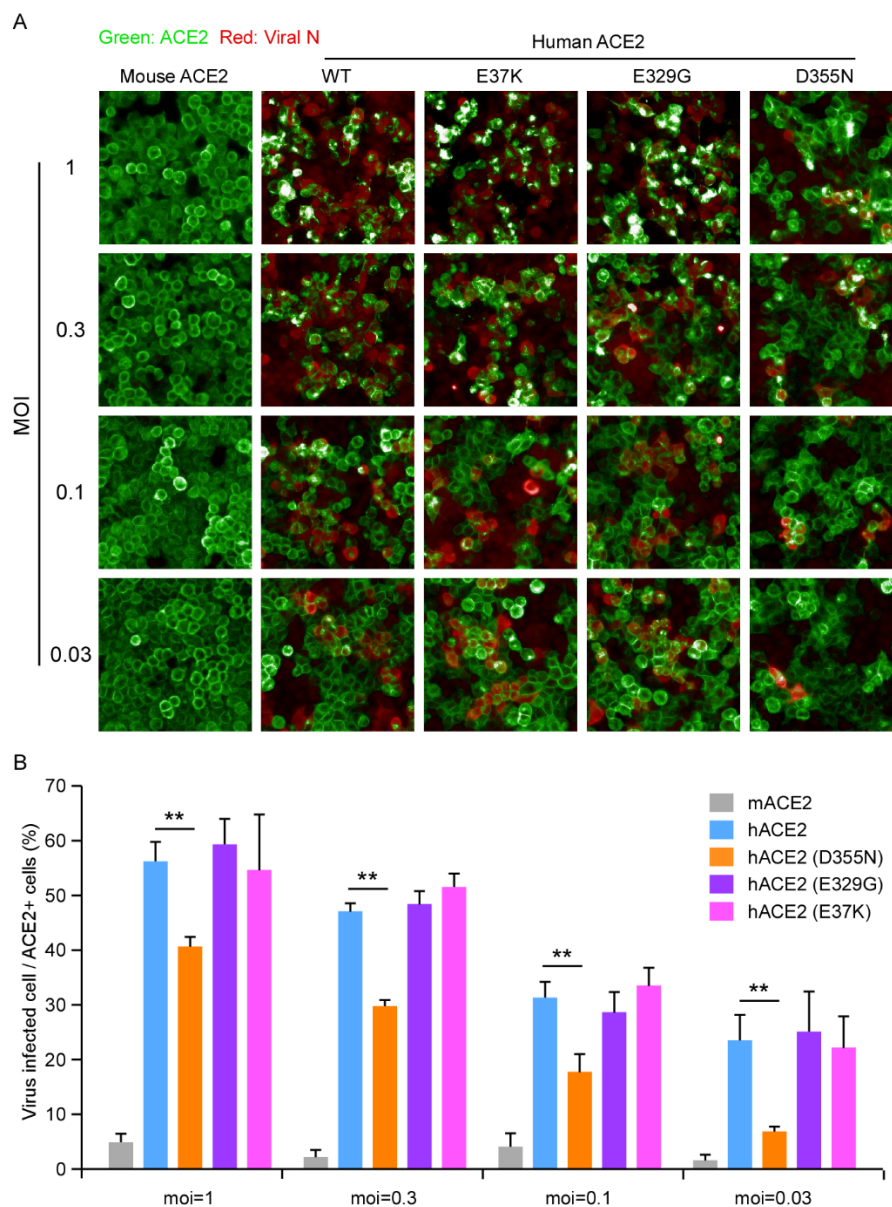

505

506 **Figure 4. The ACE2 variants mediate authentic SARS-CoV-2 virus infection *in vitro*.**

507 (A) HeLa cells transduced with lentiviruses expressing human ACE2 SNVs or mouse

508 ACE2 were infected with varying doses of SARS-CoV-2 virus (MOI=1, 0.3, 0.1 or 0.03).

509 Expression of the viral nucleocapsid (N) protein or ACE2 orthologs was visualized by

510 using the Operetta High Content Imaging System (PerkinElmer). Viral N protein (red) and

511 ACE2 variant/ortholog (green) are shown. This experiment was independently repeated  
 512 three times with similar results and representative images are shown. **(B)** The images  
 513 were analyzed and quantified using PerkinElmer Harmony high-content analysis software  
 514 4.9. The infection efficiency represents the percentage of SARS-CoV-2 infected  
 515 cells/ACE2 positive cells (y axis). Error bars represent the SD of the mean from one  
 516 representative experiment with three biological replicate samples and this experiment was  
 517 independently repeated three times. ns, no significance; \*\*,  $p < 0.01$ . Significance  
 518 assessed by one-way ANOVA.

519

520

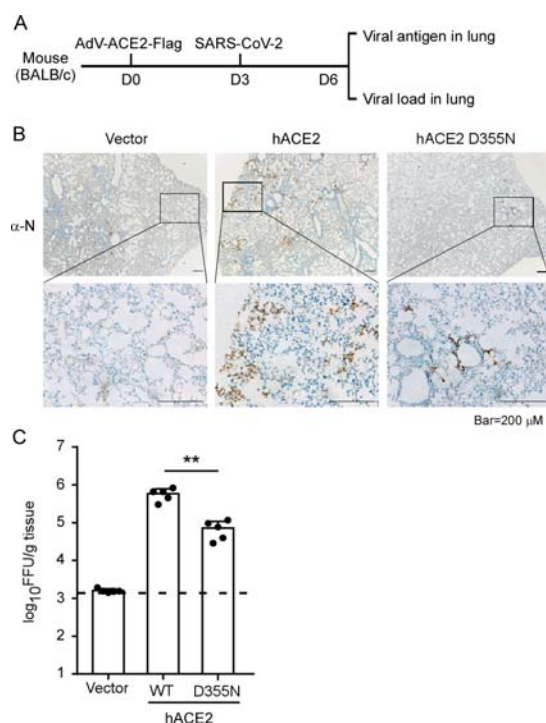

521

522 **Figure 5. The ability of ACE2 variants to mediate authentic virus entry *in vivo*. (A)**

523 Schematic representation of the experimental timeline. Wild-type BALB/c mice were

524 transduced with recombinant adenovirus expressing wild-type human ACE2 or the D355N

525 variant ACE2 variants for 3 days, followed by SARS-CoV-2 challenge. Mice were

526 sacrificed at day 3 post infection (n=5 mice per group) and lung tissues were collected for

527 immunostaining with anti-N serum (B), and viral load titration (C). Representative images

528 are shown from n = 5 mice. Scale bar, 200 $\mu$ m (B). Viral load was determined by

529 focus-forming assay. \*\*, p < 0.01. Significance assessed by one-way ANOVA (C).

530

531

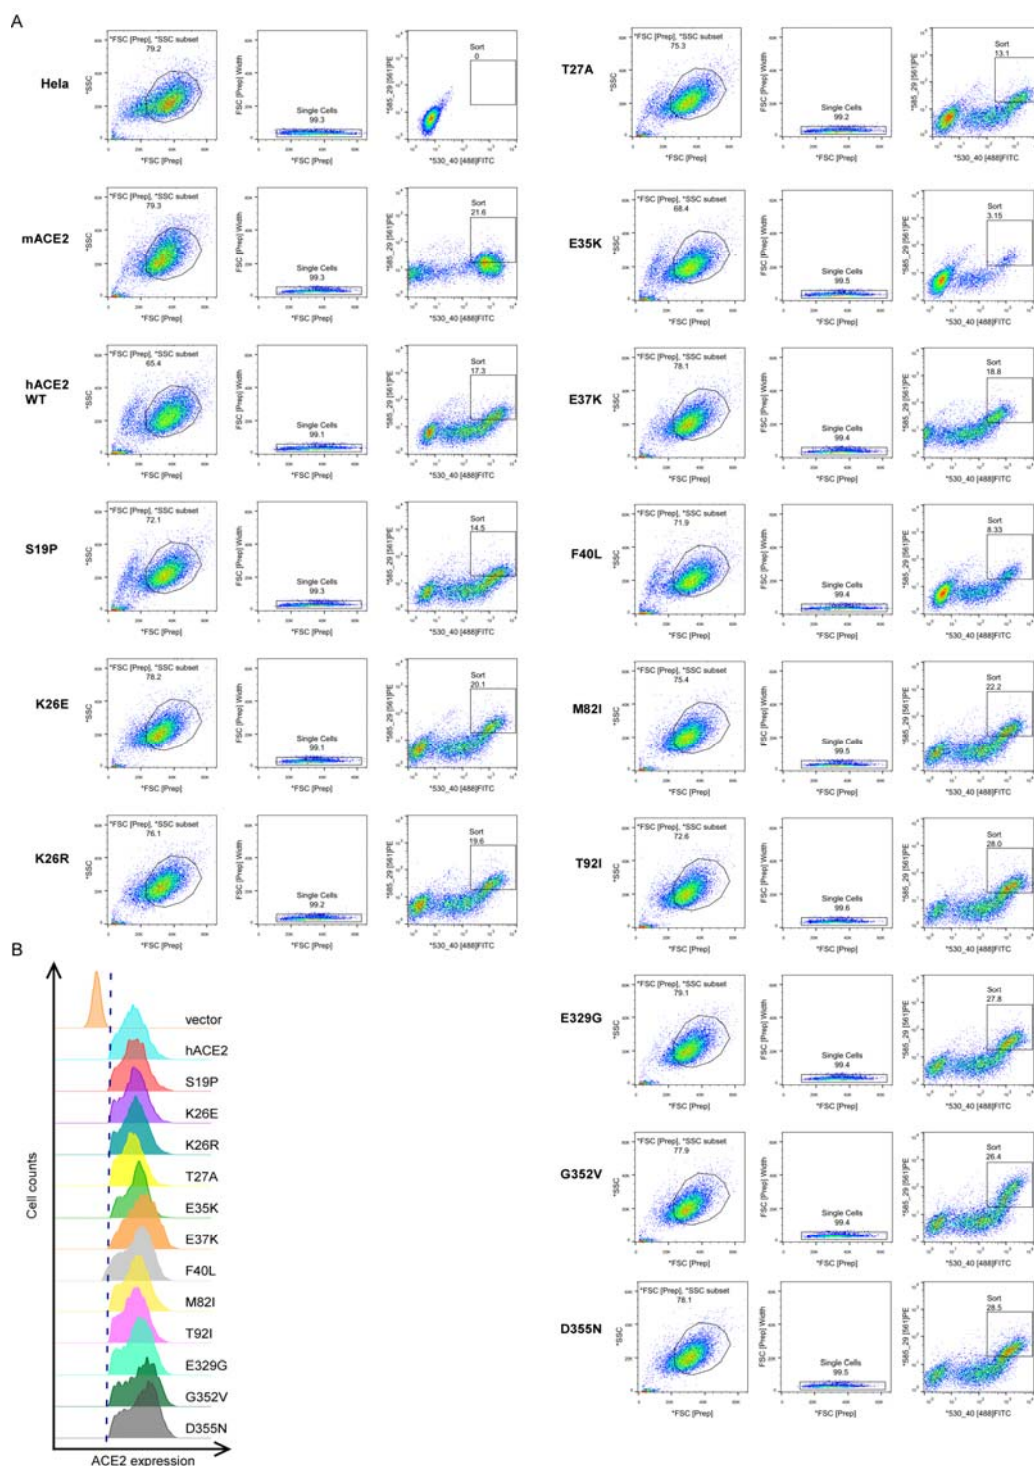

533 **Supplemental Figure 1. Sorting of the HeLa cells expressing comparable levels of**  
534 **ACE2 variants on the cell surface by fluorescence-activated cell sorting (FACS). (A)**  
535 HeLa cells transduced with lentivirus (pLVX-IRES-zsGreen1) expressing ACE2 variants  
536 were incubated with rabbit polyclonal antibody (Sino Biological Inc. China, Cat: 10108-T24)  
537 against ACE2. The cells were washed and then stained with 2µg/mL goat anti-rabbit IgG  
538 (H+L) conjugated to Alexa Fluor 568. The samples were subjected to FACS to sort the  
539 cells expressing comparable levels of the ACE2 variants on their cell surface. **(B)** The  
540 sorted cells were cultured and the cell surface ACE2 expression was validated again by  
541 cell surface staining as mentioned above **(A)**. Cell surface ACE2 was calculated as the  
542 percent of Alex Fluor 568 positive cells among the zsGreen1-positive cells. This  
543 experiment was repeated twice with similar results.  
544



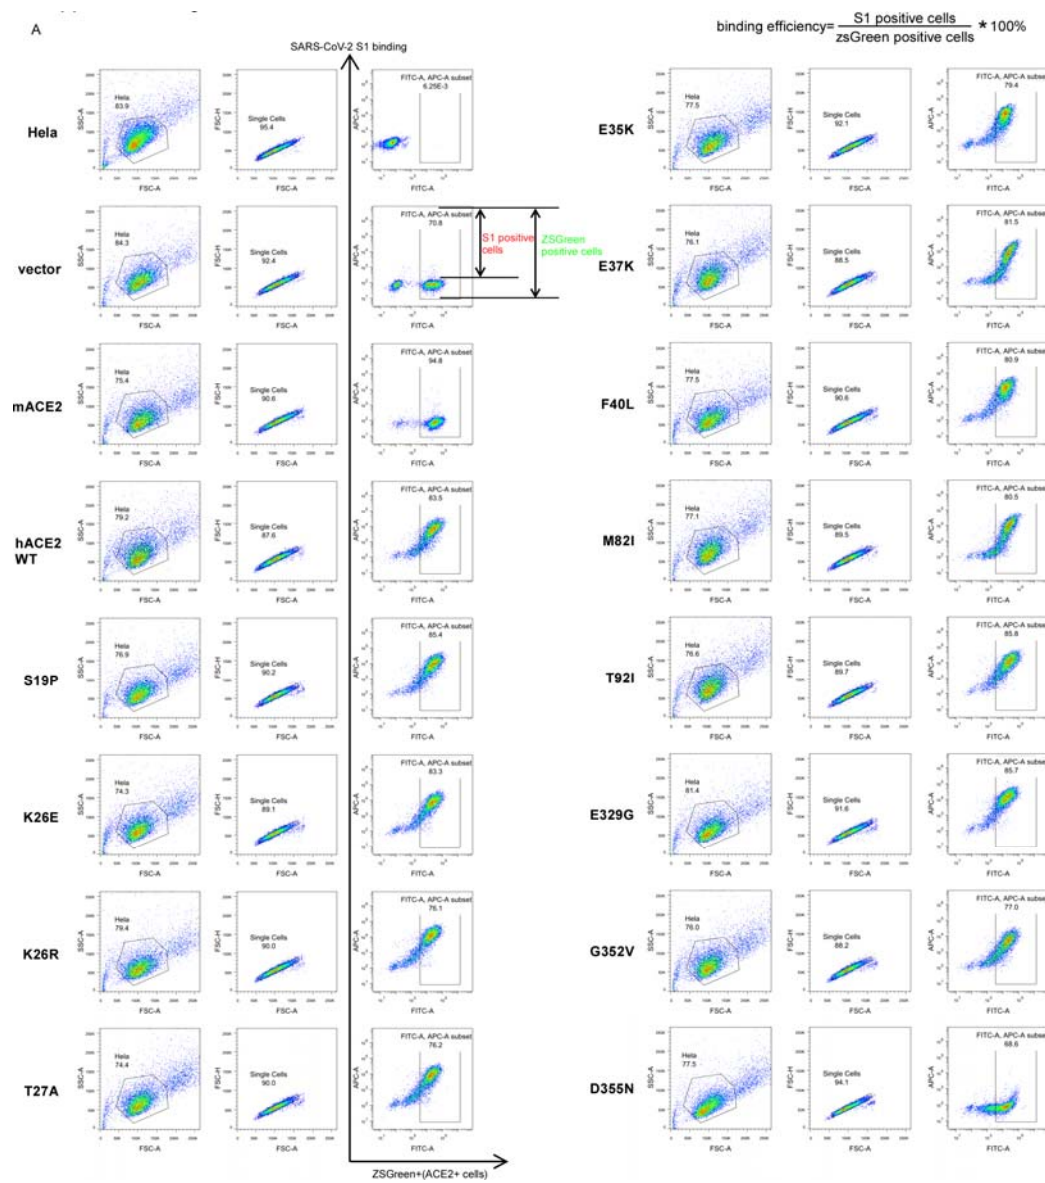

545

546

547



548

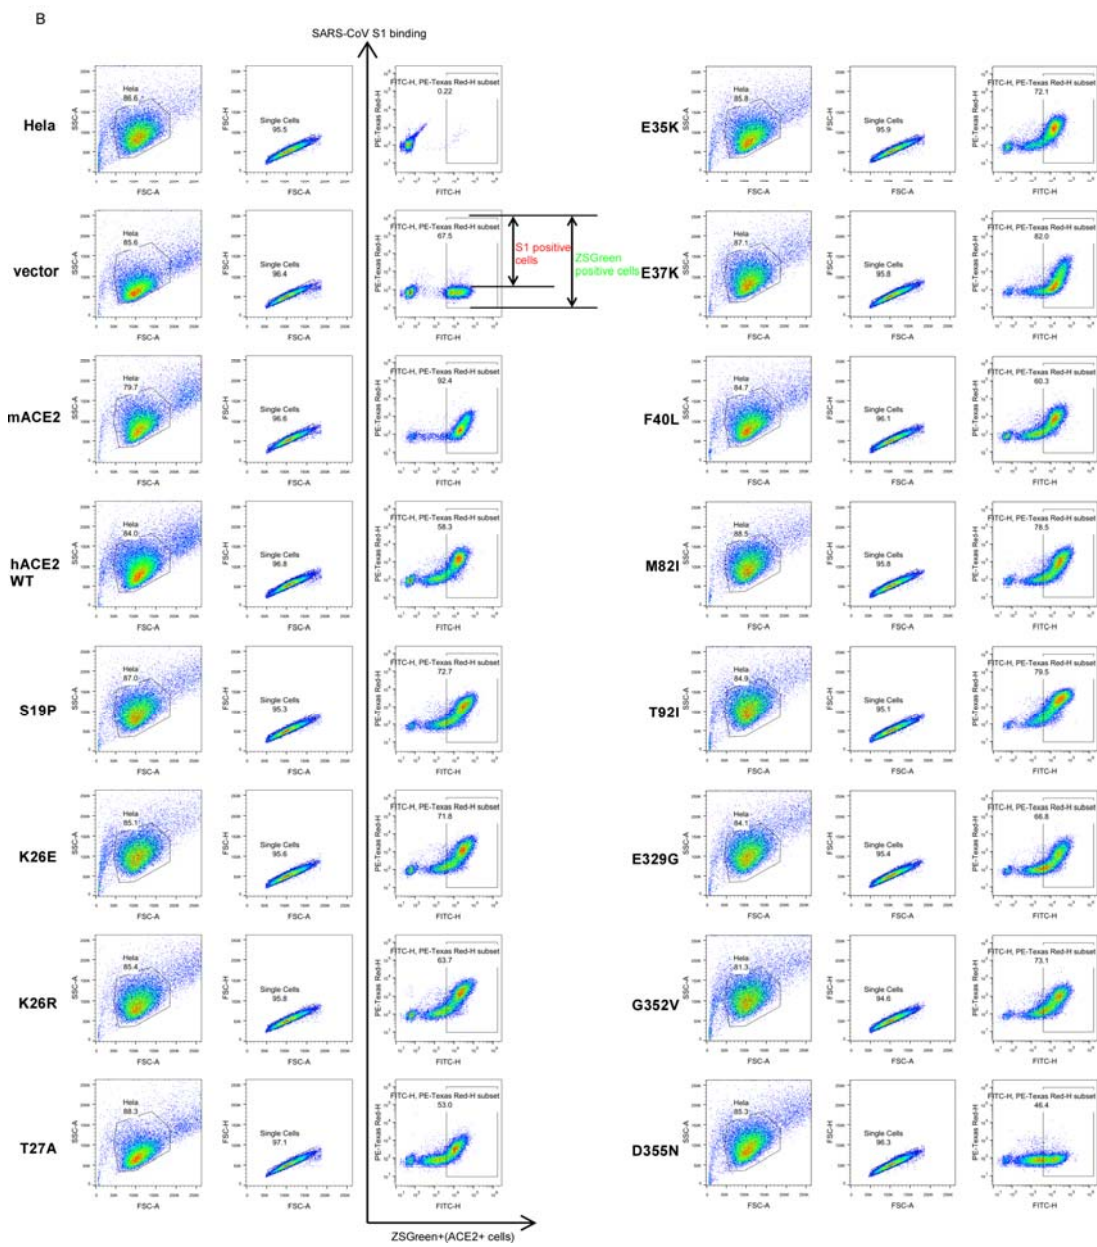

549

550

551

552

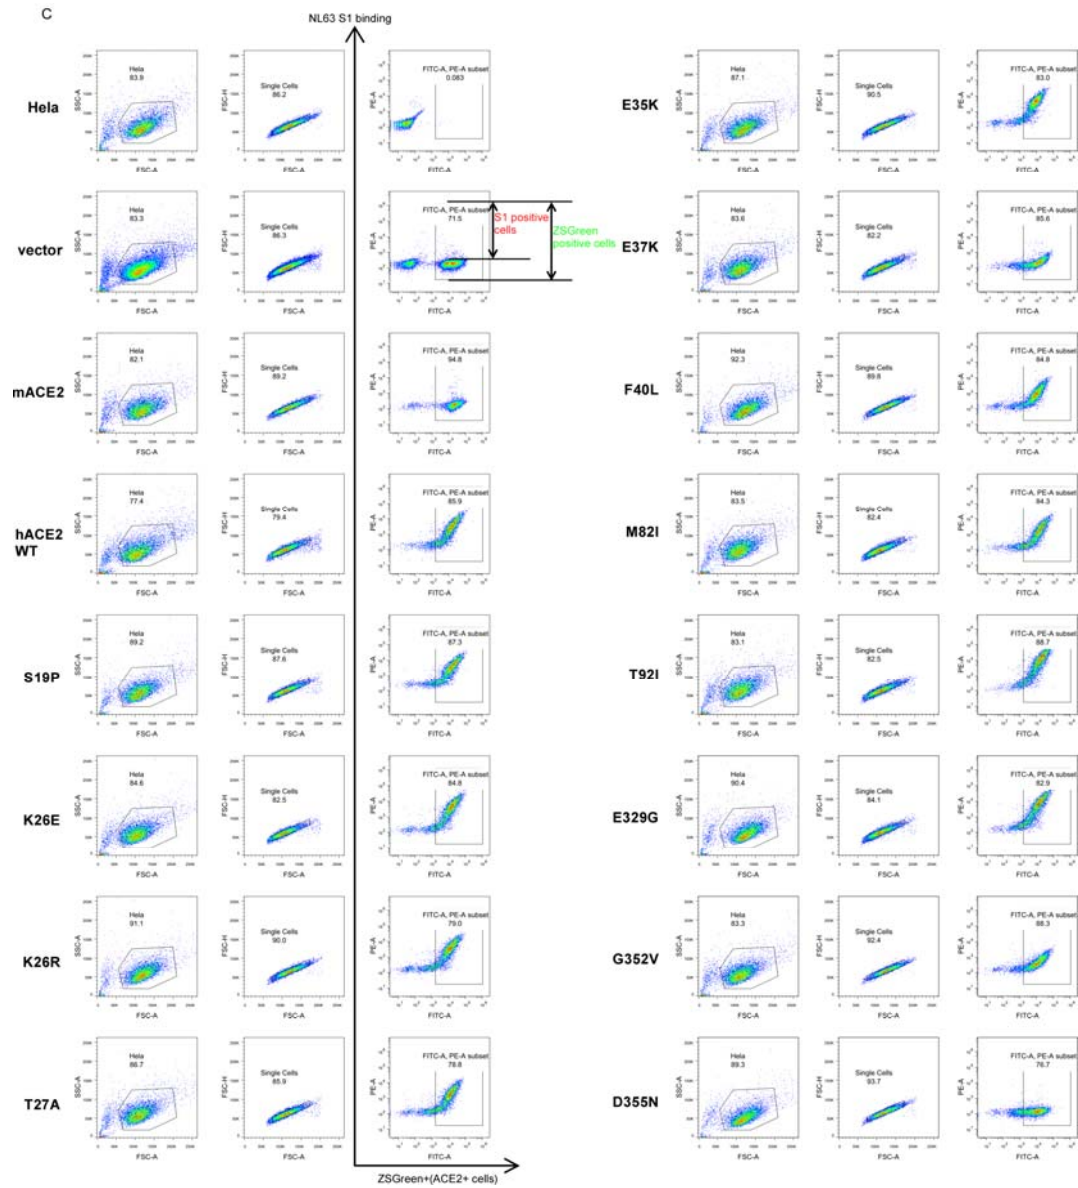

553 **Supplemental Figure 2. Gating strategy for determining the binding efficiency of the**  
554 **ACE2 variants with SARS-CoV-2, SARS-CoV or HCoV-NL63 S1-Fc protein.** The main  
555 cell population was identified and gated on forward- and side-scatter. Single cells were  
556 further gated on FSC-A and FSC-H. The gated cells were plotted by FITC-A (zsGreen1,  
557 as the ACE2-expressing population) and APC-A (S1-Fc bound population). The FITC-A

558 positive cell population was plotted as a histogram to show the SARS-CoV-2 (**A**),  
559 SARS-CoV (**B**) or HCoV-NL63 (**C**) S1-Fc positive population as **Fig. 2A**. The binding  
560 efficiency was defined as the percent of S1-Fc binding cells among the zsGreen1-positive  
561 cells. Shown are FACS plots representative of those used for the calculation of binding  
562 efficiencies of ACE2 variants with S1-Fc. A representative experiment is shown and this  
563 experiment was independently repeated three times with similar results.  
564

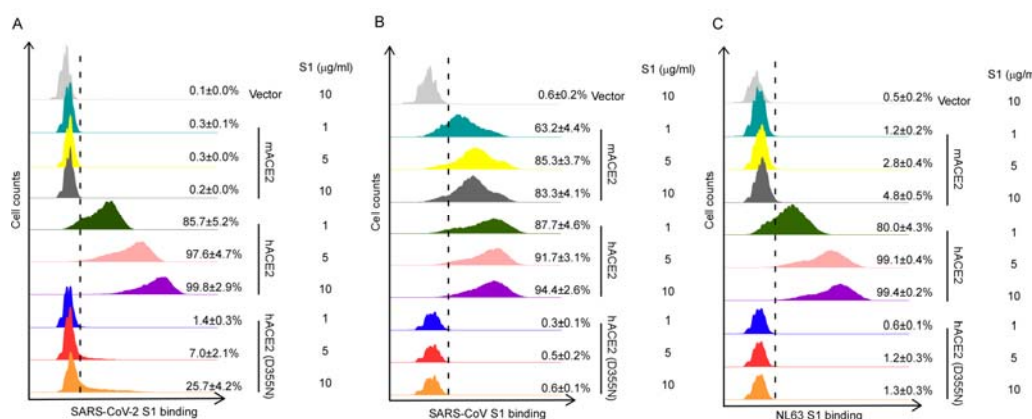

**Supplemental Figure 3. ACE2 variants bind viral spike proteins.** HeLa cells transduced with ACE2 variants, were incubated with increasing doses (1µg/ml, 5µg/ml or 10µg/ml ) of the recombinant S1 domain of SARS-CoV-2 (**A**), SARS-CoV (**B**) or HCoV-NL63 (**C**) spike proteins C-terminally fused to Fc with and then were stained with goat anti-human IgG (H + L) conjugated to Alexa Fluor 647 for flow cytometry analysis. Values are binding efficiencies defined as the percent of cells positive for S1-Fc among the ACE2-expressing cells (zsGreen1+ cells). Error bars represent the SD of the mean from one representative experiment with three biological replicate samples and this experiment was independently repeated three times.

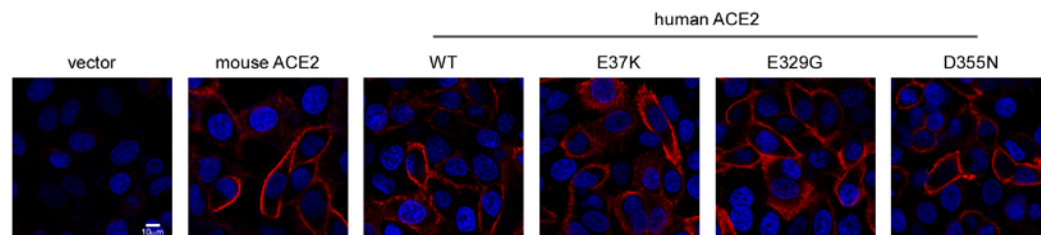

575

576 **Supplemental Figure 4. Cell surface localization of ACE2 variants.** HeLa cells  
577 transduced with lentiviruses (pLVX-IRES-zsGreen1) expressing ACE2 variants as  
578 indicated were incubated with rabbit polyclonal antibody (Sino Biological Inc. China, Cat:  
579 10108-T24) against ACE2. The cells were washed and then stained with 2µg/mL goat  
580 anti-rabbit IgG (H+L) conjugated with Alexa Fluor 568 and DAPI (1µg/ml). The cell images  
581 were captured with a Zeiss LSM 880 Confocal Microscope. ACE2 on cell surface was  
582 shown in the merge images processed by ZEN3.2 software. This experiment was  
583 independently repeated three times with similar results and the representative images are  
584 shown.

585

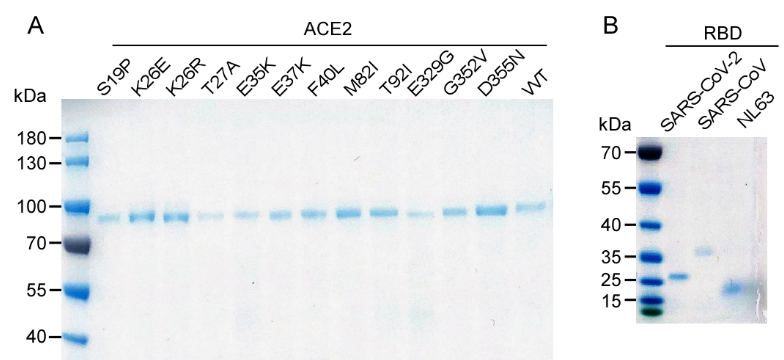

586

587 **Supplemental Figure 5. Analysis of the purified ACE2 variants and coronavirus**  
588 **spike proteins by SDS-PAGE.** The N-terminal peptidase domain of each human ACE2  
589 (residues Met1-Asp615) variant (**A**), SARS-CoV-2 RBD (residues Thr333-Pro527),  
590 SARS-CoV RBD (residues Arg306–Leu515), or NL63-CoV RBD (residues Gln481-Ile616)  
591 (**B**) were expressed and purified as described in the **Materials and Methods**. The purified  
592 proteins were analyzed by SDS-PAGE with Coomassie blue staining.

593



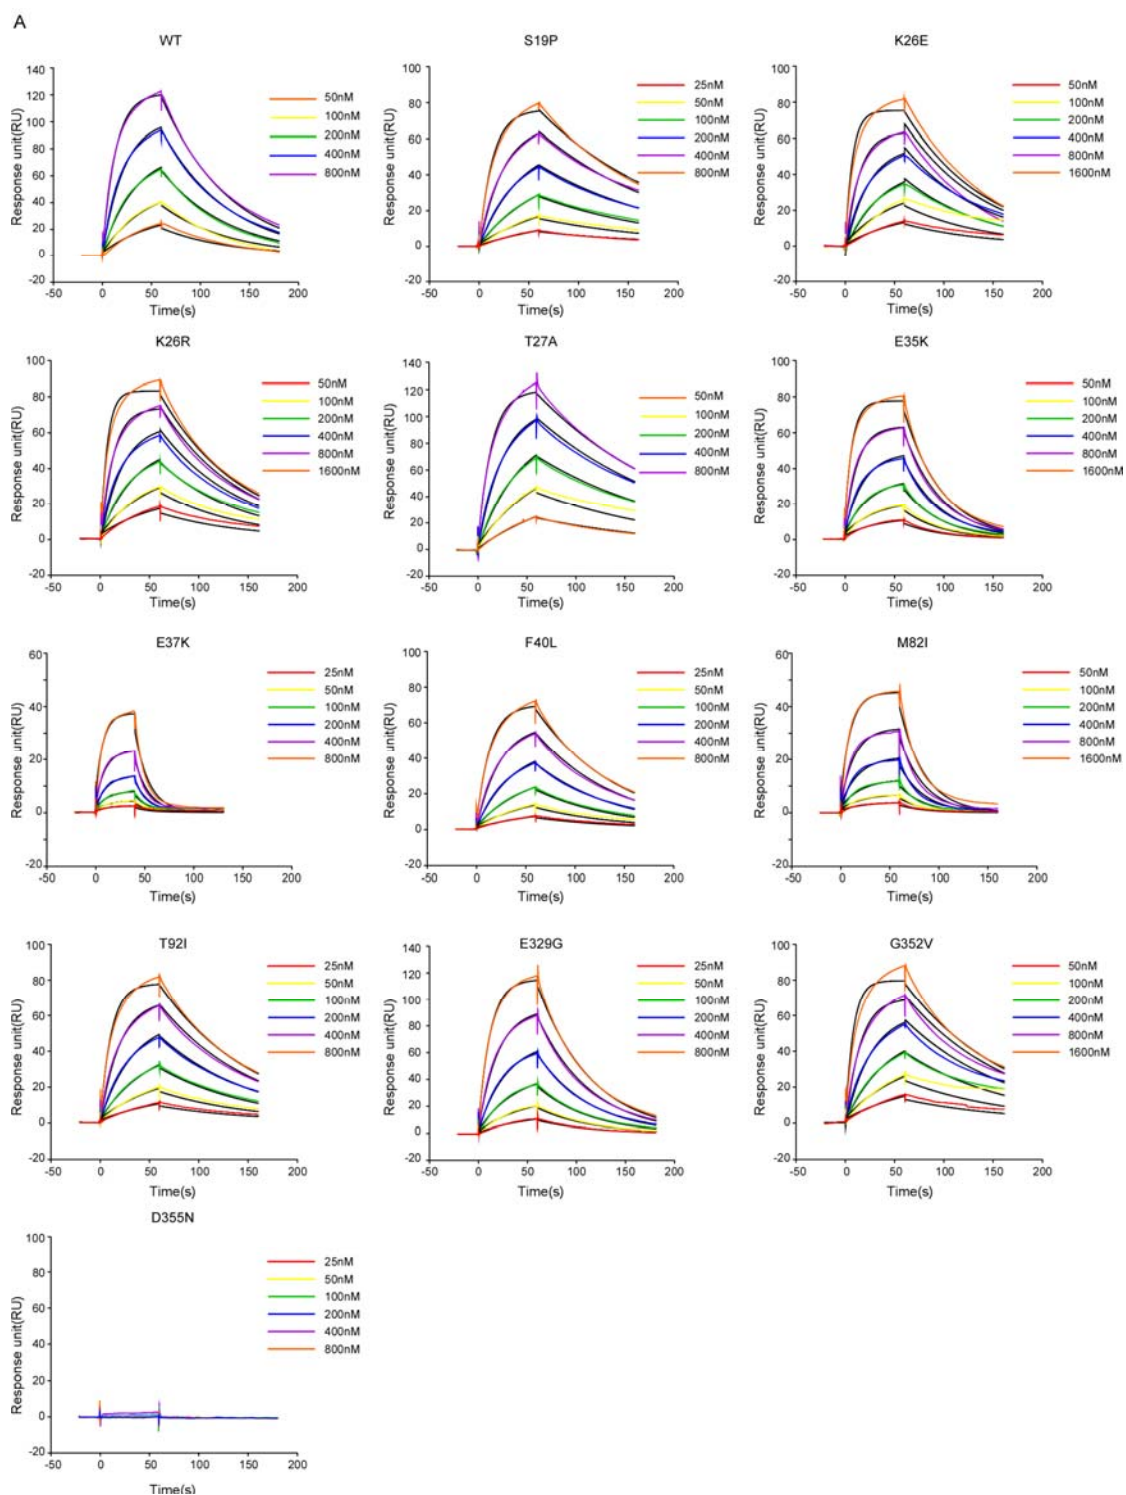

595



B

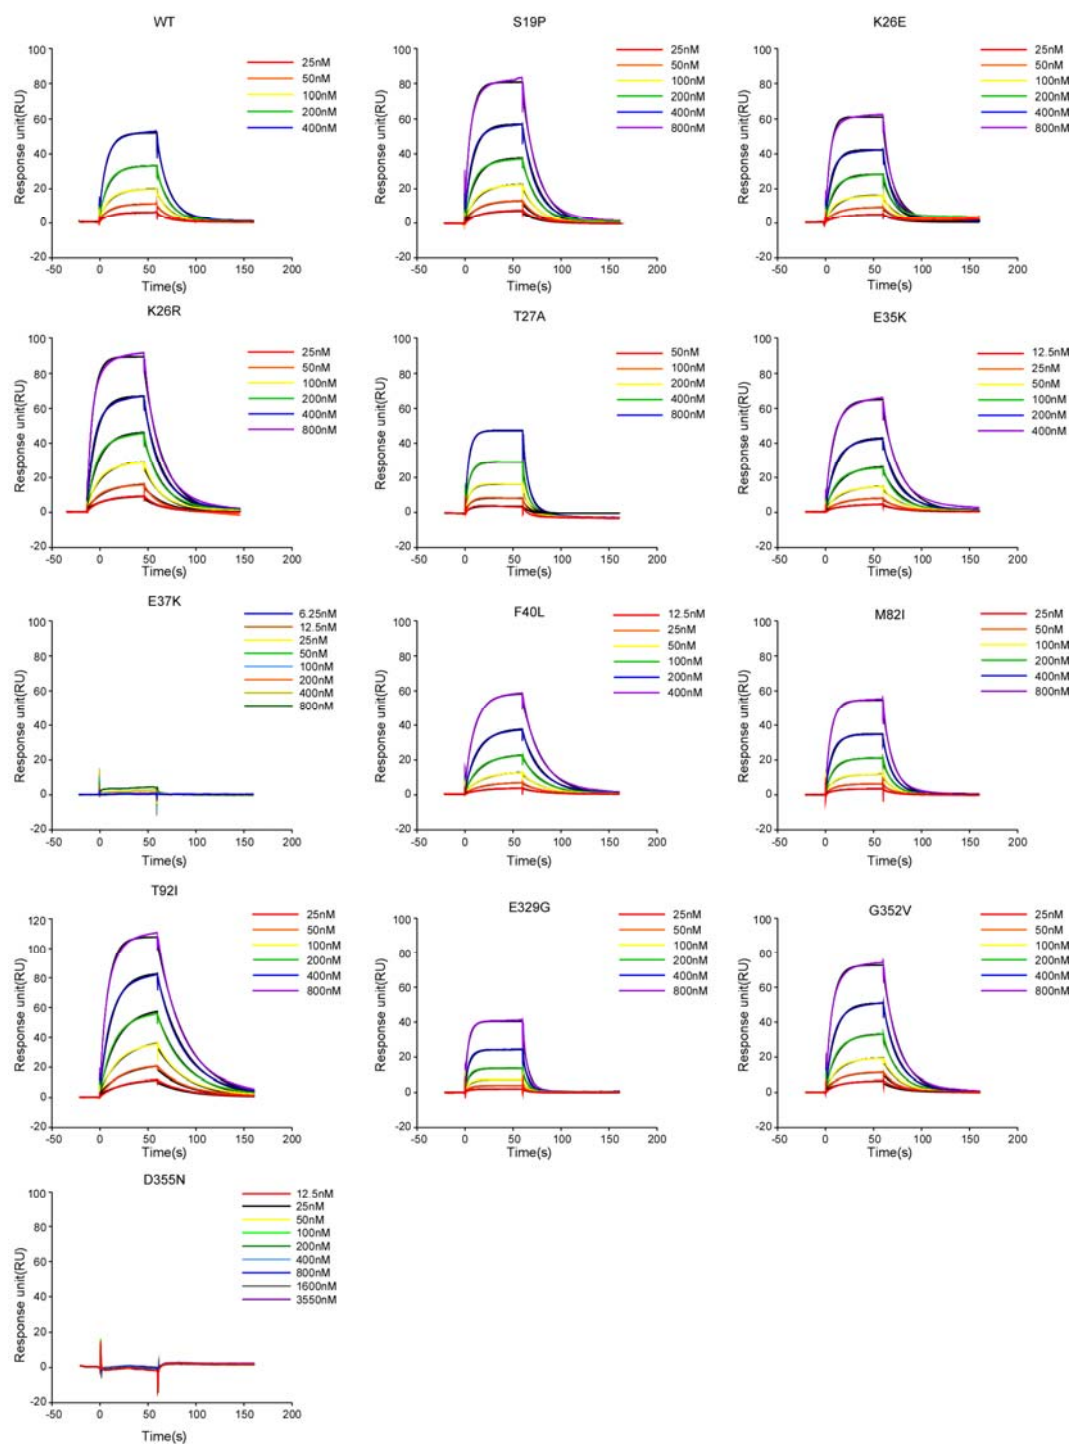

597

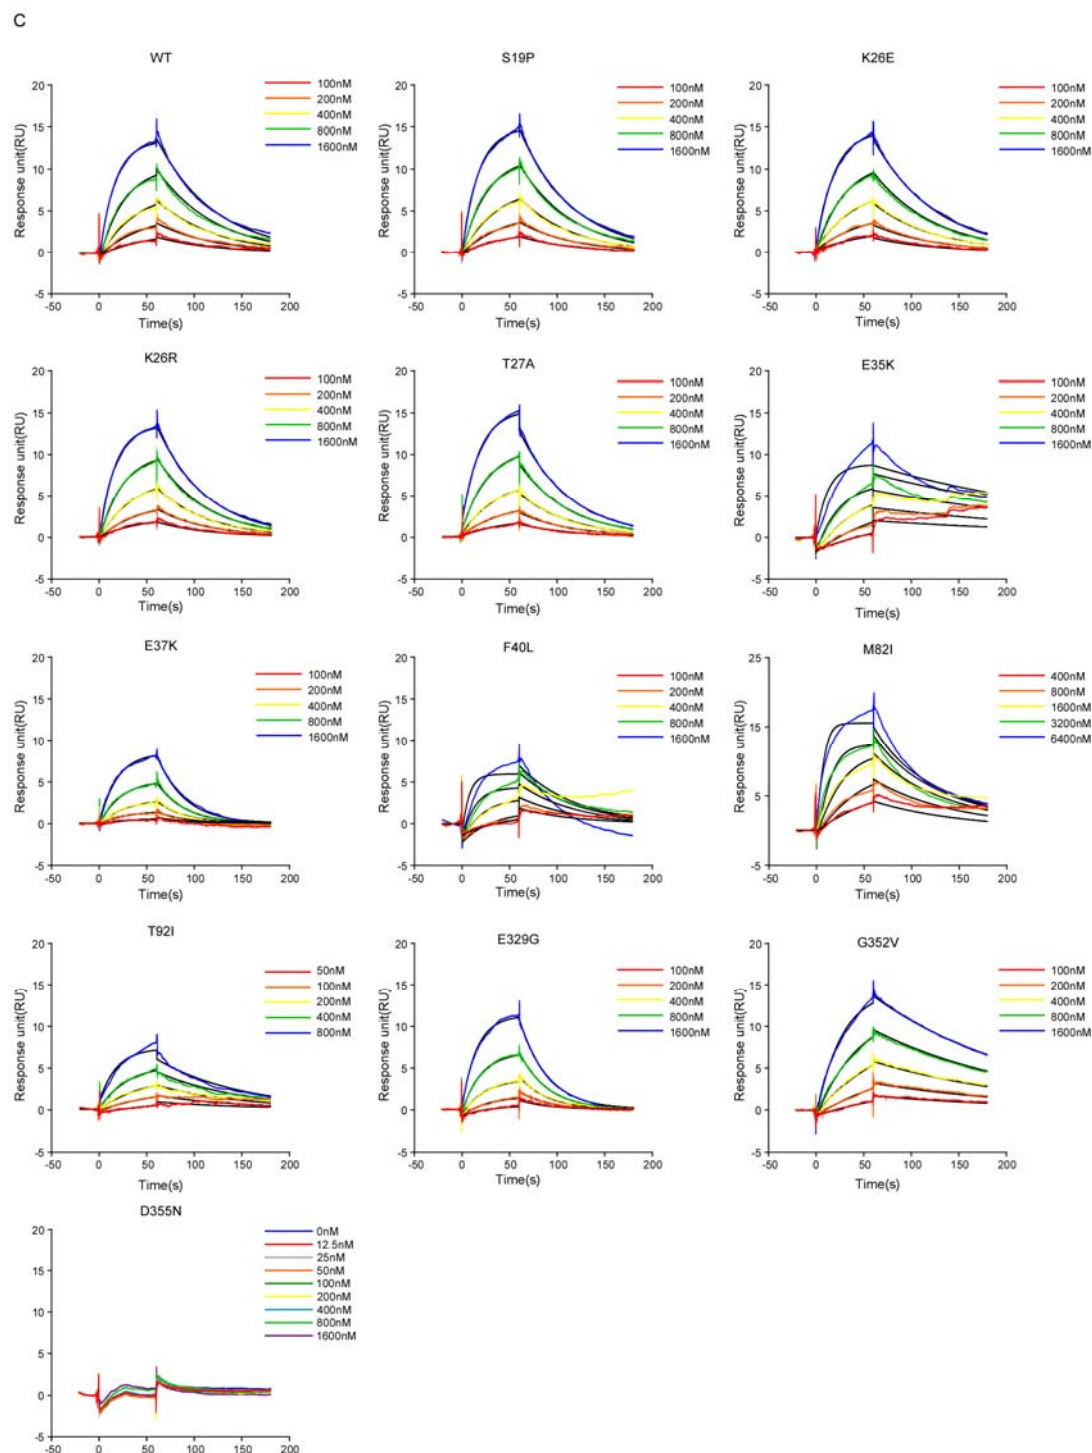

598 **Supplemental Figure 6. Characterizing the binding affinity of ACE2 variants with**

599 **coronavirus spike proteins by SPR analysis.** SARS-CoV-2 RBD (**A**), SARS-CoV RBD  
600 (**B**) or HCoV-NL63 RBD (**C**) was immobilized to a CM5 sensorchip (GE Healthcare);  
601 ACE2 SNV proteins of different concentrations were injected. Response units were  
602 plotted against protein concentrations. The  $K_d$  values were calculated by BIAcore 3000  
603 analysis. This experiment was independently repeated three times with similar results and  
604 representative results are shown.  
605

# References

- 1 Fung, T. S. & Liu, D. X. Human Coronavirus: Host-Pathogen Interaction. *Annu Rev Microbiol* **73**, 529-557, doi:10.1146/annurev-micro-020518-115759 (2019).
- 2 Lai, M. M. Coronavirus: organization, replication and expression of genome. *Annu Rev Microbiol* **44**, 303-333, doi:10.1146/annurev.mi.44.100190.001511 (1990).
- 3 Ksiazek, T. G. *et al.* A novel coronavirus associated with severe acute respiratory syndrome. *N Engl J Med* **348**, 1953-1966, doi:10.1056/NEJMoa030781 (2003).
- 4 Zaki, A. M., van Boheemen, S., Bestebroer, T. M., Osterhaus, A. D. & Fouchier, R. A. Isolation of a novel coronavirus from a man with pneumonia in Saudi Arabia. *N Engl J Med* **367**, 1814-1820, doi:10.1056/NEJMoa1211721 (2012).
- 5 Morens, D. M. & Fauci, A. S. Emerging Pandemic Diseases: How We Got to COVID-19. *Cell* **182**, 1077-1092, doi:10.1016/j.cell.2020.08.021 (2020).
- 6 Cui, J., Li, F. & Shi, Z. L. Origin and evolution of pathogenic coronaviruses. *Nat Rev Microbiol* **17**, 181-192, doi:10.1038/s41579-018-0118-9 (2019).
- 7 Wu, F. *et al.* A new coronavirus associated with human respiratory disease in China. *Nature* **579**, 265-269, doi:10.1038/s41586-020-2008-3 (2020).
- 8 Wang, Y. T. *et al.* Spiking Pandemic Potential: Structural and Immunological Aspects of SARS-CoV-2. *Trends Microbiol* **28**, 605-618, doi:10.1016/j.tim.2020.05.012 (2020).
- 9 Biti, R. *et al.* HIV-1 infection in an individual homozygous for the CCR5 deletion allele. *Nat Med* **3**, 252-253, doi:10.1038/nm0397-252 (1997).
- 10 Theodorou, I., Meyer, L., Magierowska, M., Katlama, C. & Rouzioux, C. HIV-1

627 infection in an individual homozygous for CCR5 delta 32. Seroco Study Group. *Lancet*  
628 **349**, 1219-1220 (1997).

629 11 Huang, Y. *et al.* The role of a mutant CCR5 allele in HIV-1 transmission and disease  
630 progression. *Nat Med* **2**, 1240-1243, doi:10.1038/nm1196-1240 (1996).

631 12 Kariuki, S. N. & Williams, T. N. Human genetics and malaria resistance. *Hum Genet*  
632 **139**, 801-811, doi:10.1007/s00439-020-02142-6 (2020).

633 13 Casanova, J. L., Su, H. C. & Effort, C. H. G. A Global Effort to Define the Human  
634 Genetics of Protective Immunity to SARS-CoV-2 Infection. *Cell* **181**, 1194-1199,  
635 doi:10.1016/j.cell.2020.05.016 (2020).

636 14 Initiative, C.-H. G. The COVID-19 Host Genetics Initiative, a global initiative to  
637 elucidate the role of host genetic factors in susceptibility and severity of the  
638 SARS-CoV-2 virus pandemic. *Eur J Hum Genet* **28**, 715-718,  
639 doi:10.1038/s41431-020-0636-6 (2020).

640 15 Severe Covid, G. G. *et al.* Genomewide Association Study of Severe Covid-19 with  
641 Respiratory Failure. *N Engl J Med* **383**, 1522-1534, doi:10.1056/NEJMoa2020283  
642 (2020).

643 16 Zeberg, H. & Paabo, S. The major genetic risk factor for severe COVID-19 is inherited  
644 from Neanderthals. *Nature* **587**, 610-612, doi:10.1038/s41586-020-2818-3 (2020).

645 17 Bastard, P. *et al.* Autoantibodies against type I IFNs in patients with life-threatening  
646 COVID-19. *Science* **370**, doi:10.1126/science.abd4585 (2020).

647 18 Zhang, Q. *et al.* Inborn errors of type I IFN immunity in patients with life-threatening

648 COVID-19. *Science* **370**, doi:10.1126/science.abd4570 (2020).

649 19 Zhou, P. *et al.* A pneumonia outbreak associated with a new coronavirus of probable  
650 bat origin. *Nature* **579**, 270-273, doi:10.1038/s41586-020-2012-7 (2020).

651 20 Fung, T. S. & Liu, D. X. Similarities and Dissimilarities of COVID-19 and Other  
652 Coronavirus Diseases. *Annu Rev Microbiol*,  
653 doi:10.1146/annurev-micro-110520-023212 (2021).

654 21 Li, W. *et al.* Angiotensin-converting enzyme 2 is a functional receptor for the SARS  
655 coronavirus. *Nature* **426**, 450-454, doi:10.1038/nature02145 (2003).

656 22 Hofmann, H. *et al.* Human coronavirus NL63 employs the severe acute respiratory  
657 syndrome coronavirus receptor for cellular entry. *Proc Natl Acad Sci U S A* **102**,  
658 7988-7993, doi:10.1073/pnas.0409465102 (2005).

659 23 Hu, B., Guo, H., Zhou, P. & Shi, Z. L. Characteristics of SARS-CoV-2 and COVID-19.  
660 *Nat Rev Microbiol*, doi:10.1038/s41579-020-00459-7 (2020).

661 24 Hamming, I. *et al.* The emerging role of ACE2 in physiology and disease. *J Pathol* **212**,  
662 1-11, doi:10.1002/path.2162 (2007).

663 25 Donoghue, M. *et al.* A novel angiotensin-converting enzyme-related carboxypeptidase  
664 (ACE2) converts angiotensin I to angiotensin 1-9. *Circ Res* **87**, E1-9,  
665 doi:10.1161/01.res.87.5.e1 (2000).

666 26 Frossard, P. M., Malloy, M. J., Lestringant, G. G. & Kane, J. P. Haplotypes of the  
667 human renin gene associated with essential hypertension and stroke. *J Hum*  
668 *Hypertens* **15**, 49-55, doi:10.1038/sj.jhh.1001107 (2001).

669 27 Yang, W. *et al.* Association study of ACE2 (angiotensin I-converting enzyme 2) gene  
670 polymorphisms with coronary heart disease and myocardial infarction in a Chinese  
671 Han population. *Clin Sci (Lond)* **111**, 333-340, doi:10.1042/CS20060020 (2006).

672 28 Lan, J. *et al.* Structure of the SARS-CoV-2 spike receptor-binding domain bound to the  
673 ACE2 receptor. *Nature* **581**, 215-220, doi:10.1038/s41586-020-2180-5 (2020).

674 29 Shang, J. *et al.* Structural basis of receptor recognition by SARS-CoV-2. *Nature* **581**,  
675 221-224, doi:10.1038/s41586-020-2179-y (2020).

676 30 Wang, Q. *et al.* Structural and Functional Basis of SARS-CoV-2 Entry by Using  
677 Human ACE2. *Cell* **181**, 894-904.e899, doi:10.1016/j.cell.2020.03.045 (2020).

678 31 Wu, K., Li, W., Peng, G. & Li, F. Crystal structure of NL63 respiratory coronavirus  
679 receptor-binding domain complexed with its human receptor. *Proc Natl Acad Sci U S*  
680 *A* **106**, 19970-19974, doi:10.1073/pnas.0908837106 (2009).

681 32 Li, F., Li, W., Farzan, M. & Harrison, S. C. Structure of SARS coronavirus spike  
682 receptor-binding domain complexed with receptor. *Science* **309**, 1864-1868,  
683 doi:10.1126/science.1116480 (2005).

684 33 Rodrigues, C. H. M., Myung, Y., Pires, D. E. V. & Ascher, D. B. mCSM-PPI2:  
685 predicting the effects of mutations on protein-protein interactions. *Nucleic Acids Res*  
686 **47**, W338-W344, doi:10.1093/nar/gkz383 (2019).

687 34 Liu, Y. *et al.* Functional and genetic analysis of viral receptor ACE2 orthologs reveals a  
688 broad potential host range of SARS-CoV-2. *Proc Natl Acad Sci U S A* **118**,  
689 doi:10.1073/pnas.2025373118 (2021).

690 35 Ren, W. *et al.* Comparative analysis reveals the species-specific genetic determinants  
691 of ACE2 required for SARS-CoV-2 entry. *PLoS Pathog* **17**, e1009392,  
692 doi:10.1371/journal.ppat.1009392 (2021).

693 36 Hassan, A. O. *et al.* A SARS-CoV-2 Infection Model in Mice Demonstrates Protection  
694 by Neutralizing Antibodies. *Cell* **182**, 744-753 e744, doi:10.1016/j.cell.2020.06.011  
695 (2020).

696 37 Jiang, R. D. *et al.* Pathogenesis of SARS-CoV-2 in Transgenic Mice Expressing  
697 Human Angiotensin-Converting Enzyme 2. *Cell* **182**, 50-58 e58,  
698 doi:10.1016/j.cell.2020.05.027 (2020).

699 38 Bhopal, S. S. & Bhopal, R. Sex differential in COVID-19 mortality varies markedly by  
700 age. *Lancet* **396**, 532-533, doi:10.1016/S0140-6736(20)31748-7 (2020).

701 39 Hoffmann, M. *et al.* SARS-CoV-2 Cell Entry Depends on ACE2 and TMPRSS2 and Is  
702 Blocked by a Clinically Proven Protease Inhibitor. *Cell* **181**, 271-280 e278,  
703 doi:10.1016/j.cell.2020.02.052 (2020).

704 40 Li, F. Structural analysis of major species barriers between humans and palm civets  
705 for severe acute respiratory syndrome coronavirus infections. *J Virol* **82**, 6984-6991,  
706 doi:10.1128/JVI.00442-08 (2008).

707 41 Li, F. Receptor recognition and cross-species infections of SARS coronavirus.  
708 *Antiviral Res* **100**, 246-254, doi:10.1016/j.antiviral.2013.08.014 (2013).

709 42 Li, F. Receptor recognition mechanisms of coronaviruses: a decade of structural  
710 studies. *J Virol* **89**, 1954-1964, doi:10.1128/JVI.02615-14 (2015).



711 43 Matsuyama, S. *et al.* Enhanced isolation of SARS-CoV-2 by TMPRSS2-expressing  
712 cells. *Proc Natl Acad Sci U S A* **117**, 7001-7003, doi:10.1073/pnas.2002589117  
713 (2020).

714 44 Peacock, T. P., Penrice-Randal, R., Hiscox, J. A. & Barclay, W. S. SARS-CoV-2 one  
715 year on: evidence for ongoing viral adaptation. *J Gen Virol* **102**,  
716 doi:10.1099/jgv.0.001584 (2021).

717 45 Wu, A. *et al.* One year of SARS-CoV-2 evolution. *Cell Host Microbe* **29**, 503-507,  
718 doi:10.1016/j.chom.2021.02.017 (2021).

719
